# Supplementary material for: Mesomeric betaine – N-heterocyclic carbene interconversions of 1,2,4-triazolium-phenolates. Sulfur, selenium, and borane adduct formation
Source: Royal Society of Chemistry journal article supplement (doi:10.1039/c4cc08032g), 2014-10-24
Supplement: c4cc08032g1.pdf [file c4cc08032g1.pdf]

# **Mesomeric Betaine – N-Heterocyclic Carbene Interconversions of 1,2,4-Triazolium-phenolates. Sulfur, Selenium, and Borane Adduct Formations**

Ming Liu,<sup>a</sup> Martin Nieger,<sup>b</sup> and Andreas Schmidt<sup>a\*</sup>

<sup>a</sup> Clausthal University of Technology, Institute of Organic Chemistry, Leibnizstrasse 6, D-38678 Clausthal-Zellerfeld, Germany. E-mail: schmidt@ioc.tu-clausthal.de

<sup>b</sup> University of Helsinki, Laboratory of Inorganic Chemistry, Department of Chemistry, P.O. Box 55 (A.I. Virtasen aukio1), FIN-00014 University of Helsinki, Finland.

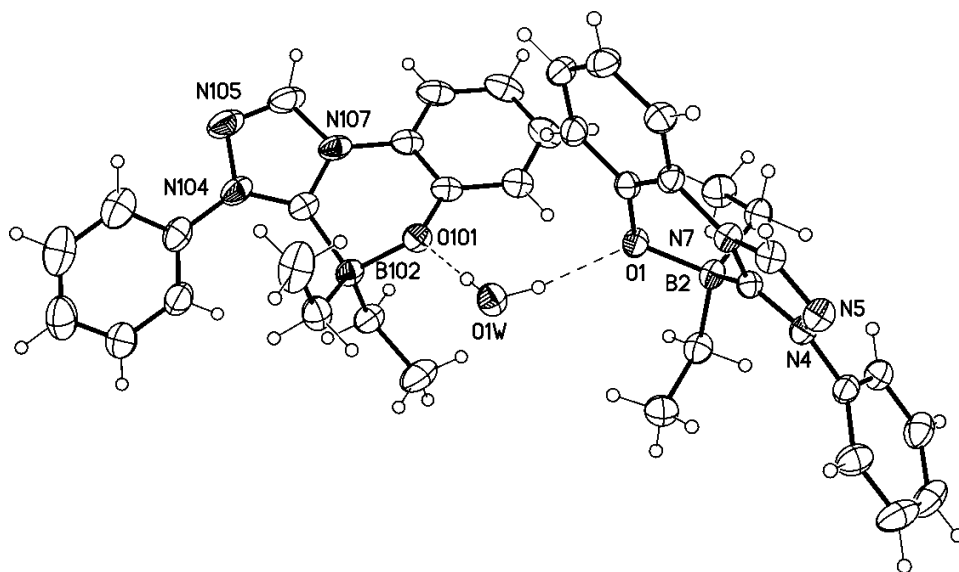

Fig. 5. Molecular drawing of the new heterocyclic ring system **15a** showing the two crystallographic independent molecules linked by a water molecule (displacement parameters are drawn at 50% probability level).

**General considerations.** Flash-chromatography was performed with silica gel 60 (0.040-0.063 mm). Nuclear magnetic resonance (NMR) spectra were obtained with a Bruker Avance 400 and Bruker Avance III 600 MHz.  $^1\text{H}$  NMR spectra were recorded at 400 MHz or 600 MHz.  $^{13}\text{C}$  NMR spectra were recorded at 100 MHz or 150 MHz, with the solvent peak or tetramethylsilane used as the internal reference. Multiplicities are described by using the following abbreviations: s = singlet, d = doublet, t = triplet, q = quartet, and m = multiplet. Signal orientations in DEPT experiments were described as follows: o = no signal; + = up ( $\text{CH}$ ,  $\text{CH}_3$ ); - = down ( $\text{CH}_2$ ). The numbering of the compounds is not always in accordance with IUPAC rules to allow comparisons ("spectroscopic numbering"). FT-IR spectra were obtained on a Bruker Alpha T in the range of 400 to  $4000\text{ cm}^{-1}$ . The mass spectra were measured with a Varian 320 MS Triple Quad GC/MS/MS with a Varian 450-GC. The electrospray ionisation mass spectra (ESIMS) were measured with an Agilent LCMSD series HP 1100 with APIES at fragmentor voltages as indicated. Samples were sprayed from MeOH at 4000 V capillary voltage and fragmentor voltages of 30 V, unless otherwise noted. Melting points are uncorrected and were determined in an apparatus according to Dr. Tottoli (Büchi). The HR-MS spectra were measured on a Bruker Daltonik Tesla-Fourier transform - ion cyclotron resonance mass spectrometer with electrospray ionisation.

### 3-Phenyl-1,3,4-oxadiazolium perchlorate 10.<sup>1</sup>

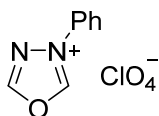

A sample of 0.893 g (5.44 mmol) of N,N'-diformyl-N-phenylhydrazine was treated under an inert atmosphere with 5.2 mL (54.4 mmol) of acetic anhydride. After cooling to 0 °C, 0.37 mL (6.5 mmol) of perchloric acid (70%) were added dropwise, whereupon a precipitate formed. Stirring was continued for one additional hour at rt. Then, 20 mL of anhyd. diethyl ether was added to the mixture. The precipitate was filtered off under an inert atmosphere and washed with Et<sub>2</sub>O. Yield: 0.994 g (74%) of a colorless solid. This compound is hygroscopic and was continuously kept under an inert atmosphere.

### 4-(2-Hydroxyphenyl)-1-phenyl-4H-1,2,4-triazolium perchlorate 11a:

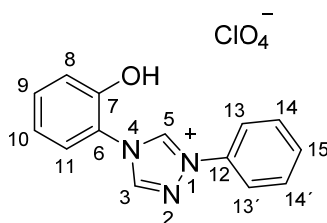

A solution of 0.450 g (4.12 mmol) of 2-aminophenol and 1.016 g (4.12 mmol) of 3-phenyl-1,3,4-oxadiazolium perchlorate in 20 mL of anhydrous THF was heated at 100 °C overnight. Then the solvent was distilled off and the residue was treated with 20 mL of diethyl ether. The precipitated solid was filtered off and dried *in vacuo*. Yield: 0.833 g (60%) of a yellowish solid, mp: 154 °C. <sup>1</sup>H NMR (400 MHz, DMSO-d<sub>6</sub>): δ = 11.27 (s, 1 H, 5-H), 11.21 (s, 1 H, OH), 9.83 (s, 1 H, 3-H), 8.01 - 8.04 (m, 2 H, 13/13'-H), 7.66 - 7.76 (m, 4 H, 14/14'/15/11-H), 7.52 (ddd, *J*<sub>1</sub> = 1.6 Hz, *J*<sub>2</sub> = 7.7 Hz, *J*<sub>3</sub> = 8.2 Hz, 1 H, 9-H), 7.22 (dd, *J*<sub>1</sub> = 1.1 Hz, *J*<sub>2</sub> = 8.2 Hz, 1 H, 8-H), 7.13 (td, *J*<sub>1</sub> = 1.1 Hz, *J*<sub>2</sub> = 7.7 Hz, 1 H, 10-H) ppm; <sup>13</sup>C NMR (100 MHz, DMSO-d<sub>6</sub>): δ = 150.6 (o, C-7), 145.1 (+, C-3), 141.4 (+, C-5), 134.9 (o, C-12), 132.3 (+, C-9), 130.7 (+, C-15), 130.2 (+, C-14/C-14'), 125.9 (+, C-11), 120.9 (+, C-13/C-13'), 119.8 (+, C-10), 119.4 (o, C-6), 117.2 (+, C-8) ppm; IR (ATR):  $\bar{\nu}$  = 3167, 1565, 1338, 1093, 1074, 1034, 999, 773, 755, 741, 639, 551, 499, 468 cm<sup>-1</sup>; MS (ESI 10 V): *m/z* (%) = 436.0 (100) [M<sup>+</sup>+2ClO<sub>4</sub>]<sup>-</sup>. HR-ESI-MS: calcd for C<sub>14</sub>H<sub>12</sub>N<sub>3</sub>O<sup>+</sup> 238.0980. Found 238.0975.

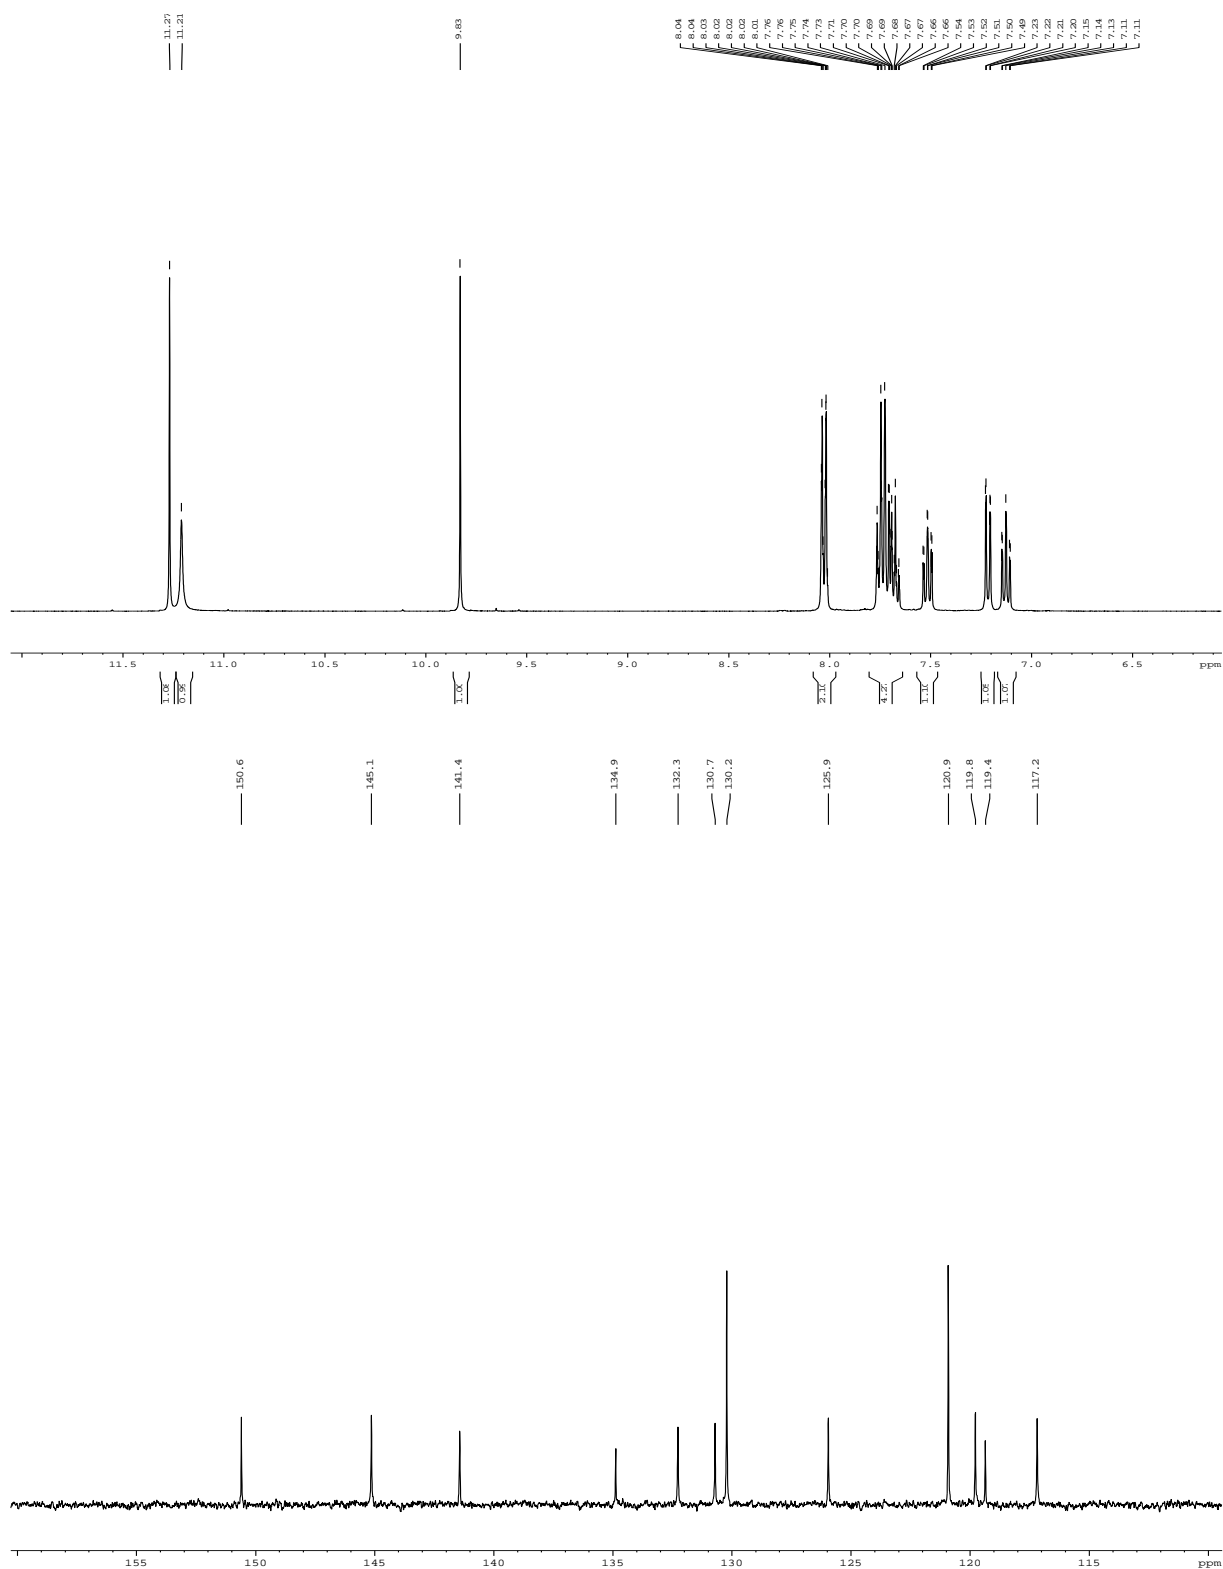

**4-(2-Hydroxy-5-methylphenyl)-1-phenyl-4*H*-1,2,4-triazolium perchlorate 11b:**

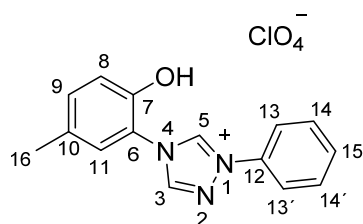

A solution of 0.530 g (4.30 mmol) of 2-amino-4-methylphenol and 1.060 g (4.30 mmol) of 3-phenyl-1,3,4-oxadiazolium perchlorate in 20 mL of anhydrous THF was heated at 100 °C overnight under an inert atmosphere. Then the solvent was distilled off and the residue was treated with 20 mL of diethyl ether. The precipitated solid was filtered off and dried *in vacuo*. Yield: 0.935 g (62%) of a yellowish solid, mp: 156 °C;  $^1\text{H}$  NMR (400 MHz,  $\text{DMSO-d}_6$ ):  $\delta$  = 11.25 (s, 1 H, 5-H), 10.95 (s, 1 H, OH), 9.81 (s, 1 H, 3-H), 8.01 - 8.03 (m, 2 H, 13/13'-H), 7.72 - 7.76 (m, 2 H, 14/14'-H), 7.67 (tt,  $J_1$  = 1.1 Hz,  $J_2$  = 7.3 Hz, 1 H, 15-H), 7.54 (d,  $J$  = 1.6 Hz, 1 H, 11-H), 7.32 (dd,  $J_1$  = 1.6 Hz,  $J_2$  = 8.4 Hz, 1 H, 9-H), 7.11 (d,  $J$  = 8.4 Hz, 1 H, 8-H), 2.33 (s, 3 H, 16-H) ppm;  $^{13}\text{C}$  NMR (100 MHz,  $\text{DMSO-d}_6$ ):  $\delta$  = 148.2 (o, C-7), 145.0 (+, C-3), 141.3 (+, C-5), 134.9 (o, C-12), 132.6 (+, C-9), 130.7 (+, C-15), 130.2 (+, C-14/C-14'), 128.9 (o, C-10), 125.8 (+, C-11), 120.9 (+, C-13/C-13'), 118.9 (o, C-6), 117.1 (+, C-8), 19.8 (+, C-16) ppm; IR (ATR):  $\bar{\nu}$  = 3241, 1567, 1522, 1289, 1268, 1144, 1123, 1108, 1095, 1046, 759, 666, 620, 475  $\text{cm}^{-1}$ ; MS (ESI 10 V):  $m/z$  (%) = 450.0 (100)  $[\text{M}^+ + 2\text{ClO}_4]^-$ . HR-ESI-MS: calcd for  $\text{C}_{15}\text{H}_{14}\text{N}_3\text{O}^+$  252.1137. Found 252.1137.

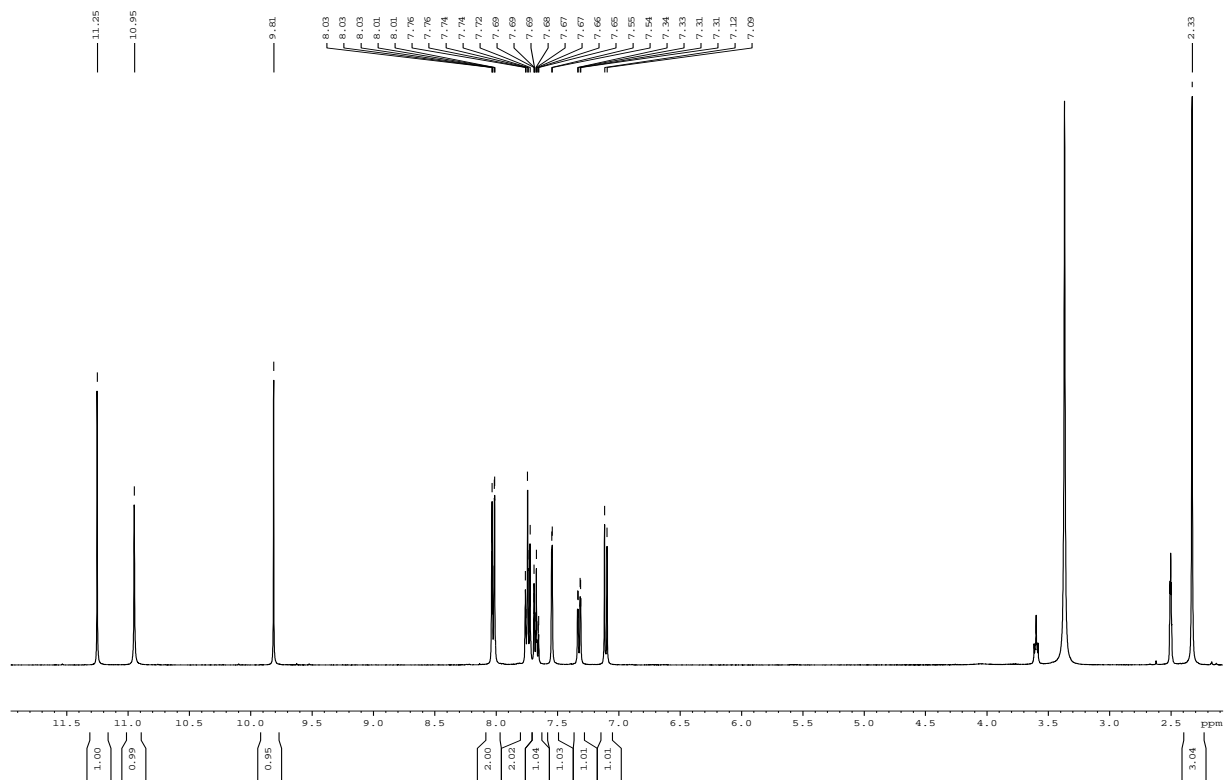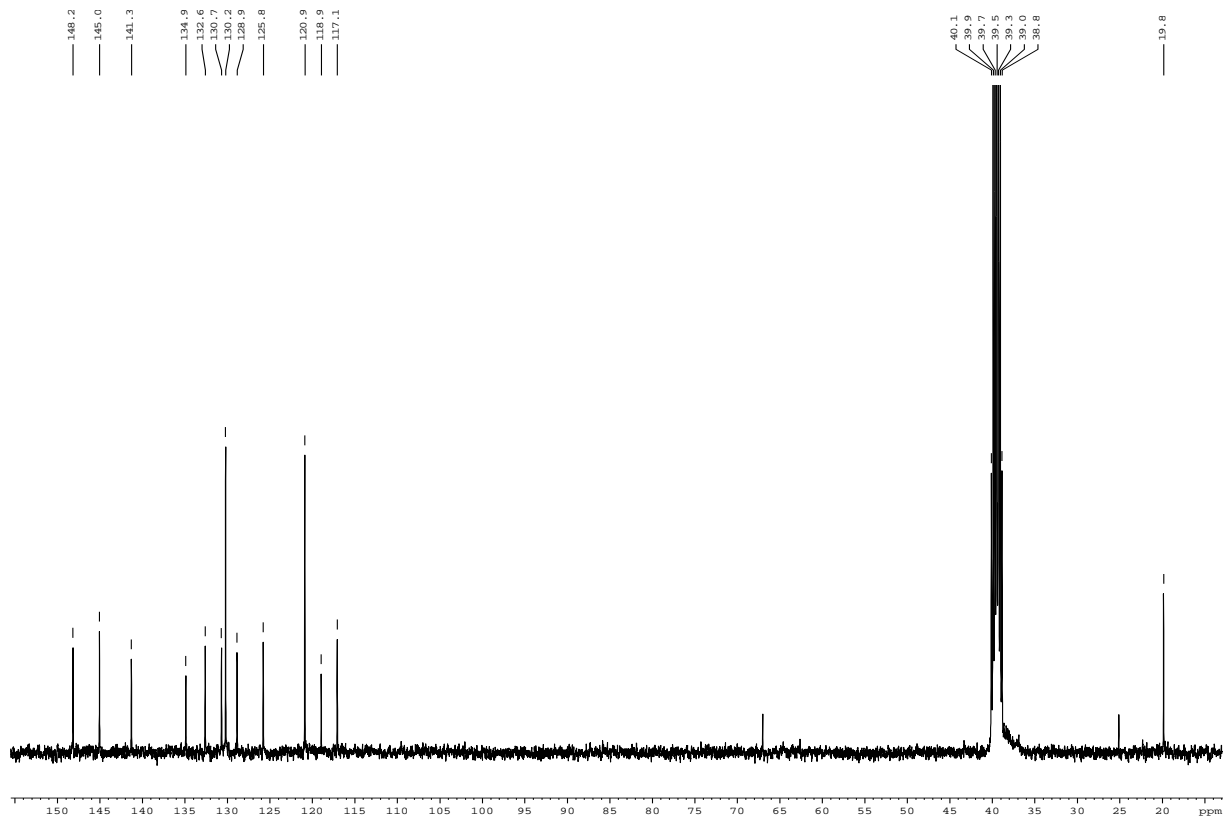

**2-(1-Phenyl-4*H*-1,2,4-triazolium-4-yl)phenolate 12a:**

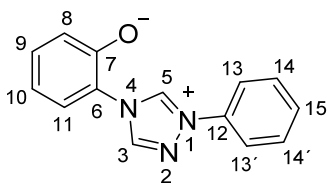

A sample of 0.338 g (1.00 mmol) of 4-(2-hydroxyphenyl)-1-phenyl-4*H*-1,2,4-triazolium perchlorate in 10 mL of MeOH was cooled to 0 °C. Then, 1.2 equiv of a 3 M solution of KOH in MeOH was added dropwise. The resulting precipitate was filtered off and the organic phase was concentrated *in vacuo*. The resulting solid was filtered off and dried *in vacuo*. Yield: 0.206 g (87%) of a yellow solid, mp: 155 °C; <sup>1</sup>H NMR (400 MHz, DMSO-*d*<sub>6</sub>): δ = 11.26 (s, 1 H, 5-H), 9.82 (s, 1 H, 3-H), 7.99 - 8.02 (m, 2 H, 13/13'-H), 7.70 - 7.74 (m, 2 H, 14/14'-H), 7.62 - 7.67 (overlapped signals, 2 H, 15/11-H), 7.37 (ddd, *J*<sub>1</sub> = 1.7 Hz, *J*<sub>2</sub> = 7.7 Hz, *J*<sub>3</sub> = 8.4 Hz, 1 H, 9-H), 7.09 (dd, *J*<sub>1</sub> = 1.1 Hz, *J*<sub>2</sub> = 8.4 Hz, 1 H, 8-H), 6.87 (td, *J*<sub>1</sub> = 1.1 Hz, *J*<sub>2</sub> = 7.7 Hz, 1 H, 10-H) ppm; <sup>13</sup>C NMR (100 MHz, DMSO-*d*<sub>6</sub>): δ = 154.4 (o, C-7), 144.9 (+, C-3), 140.9 (+, C-5), 134.9 (o, C-12), 131.8 (+, C-9), 130.5 (+, C-15), 130.2 (+, C-14/C-14'), 125.1 (+, C-11), 120.8 (+, C-13/C-13'), 119.8 (o, C-6), 118.4 (+, C-8), 116.5 (+, C-10) ppm; IR (ATR):  $\bar{\nu}$  = 2902, 1592, 1564, 1479, 1450, 1334, 1327, 1270, 977, 848, 746, 733, 629, 477, 458 cm<sup>-1</sup>; MS (ESI 30 V): *m/z* (%) = 238.1 (100) [M+H]<sup>+</sup>. HR-ESI-MS calcd for C<sub>14</sub>H<sub>13</sub>N<sub>3</sub>O<sup>+</sup>: 238.0980. Found 238.0984.

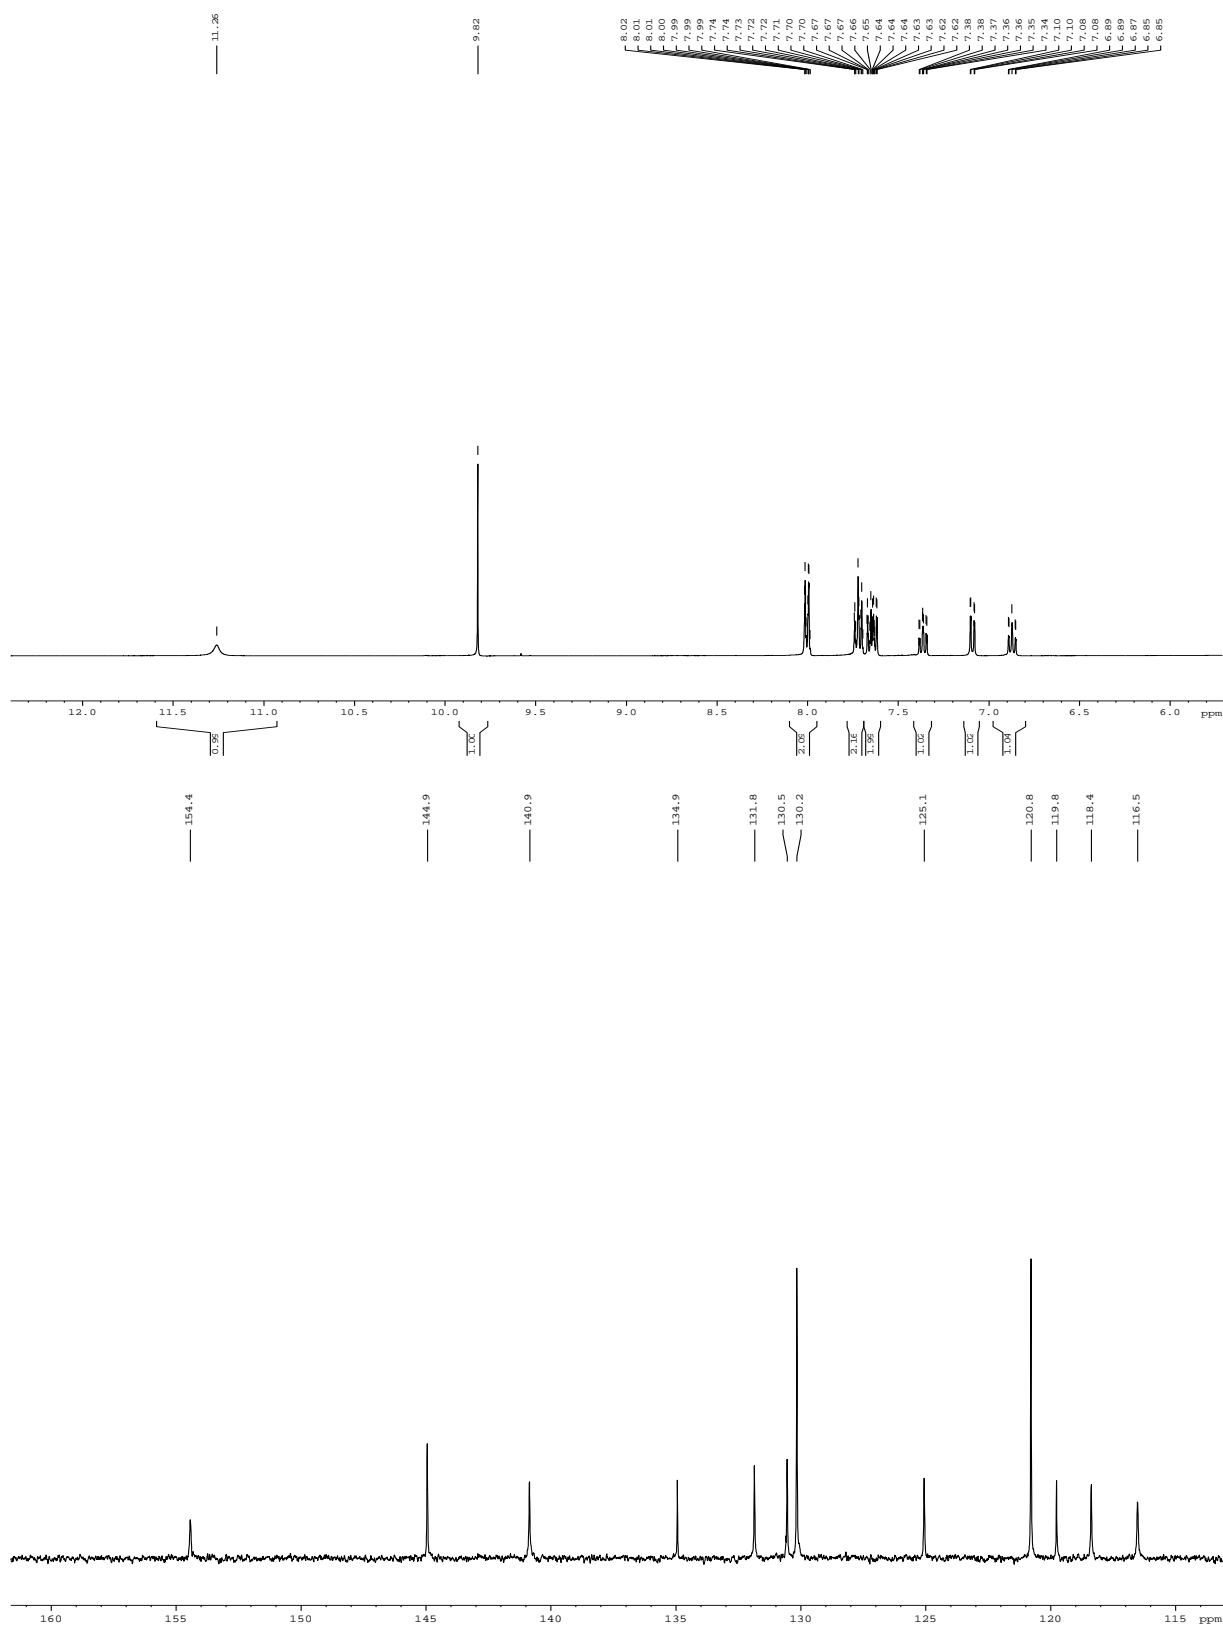

**4-Methyl-2-(1-phenyl-4*H*-1,2,4-triazolium-4-yl)phenolate 12b:**

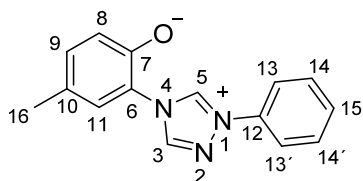

A sample of 0.351 g (1.00 mmol) of 4-(2-hydroxy-5-methylphenyl)-1-phenyl-4*H*-1,2,4-triazolium perchlorate in 10 mL of MeOH was cooled to 0 °C. Then, 1.2 equiv of a 3 M solution of KOH in MeOH was added dropwise. The resulting precipitate was filtered off and the organic phase was evaporated to dryness. The resulting solid was dried *in vacuo*. Yield: 0.153 g (61%) of a yellow solid, mp: 188°C; <sup>1</sup>H NMR (600 MHz, DMSO-*d*<sub>6</sub>): δ = 11.26 (s, 1 H, 5-H), 9.81(s, 1 H, 3-H), 7.97 - 7.99 (m, 2 H, 13/13'-H), 7.68 - 7.71 (m, 2 H, 14/14'-H), 7.63 (tt, *J*<sub>1</sub> = 1.1 Hz, *J*<sub>2</sub> = 7.4 Hz, 1 H, 15-H), 7.40 (d, *J* = 1.8 Hz, 1 H, 11-H), 7.08 (dd, *J*<sub>1</sub> = 1.8 Hz, *J*<sub>2</sub> = 8.5 Hz, 1 H, 9-H), 6.88 (d, *J* = 8.5 Hz, 1 H, 8-H), 2.24 (s, 3 H, 16-H) ppm; <sup>13</sup>C NMR (150 MHz, DMSO-*d*<sub>6</sub>): δ = 153.5 (o, C-7), 144.7 (+, C-3), 140.4 (+, C-5), 135.0 (o, C-12), 132.2 (+, C-9), 130.5 (+, C-15), 130.1 (+, C-14/C-14'), 124.5 (+, C-11), 120.7 (+, C-13/C-13'), 119.4 (o, C-6), 118.8 (+, C-8), 19.8 (+, C-16) ppm; IR (ATR):  $\bar{\nu}$  = 3136, 1569, 1275, 1100, 1082, 1047, 988, 872, 757, 665, 629, 619, 455 cm<sup>-1</sup>; MS (ESI 30 V): *m/z* (%) = 252.1 (100) [M+H]<sup>+</sup>. HR-ESI-MS calcd for C<sub>15</sub>H<sub>15</sub>N<sub>3</sub>O<sup>+</sup>: 252.1137. Found 252.1129.

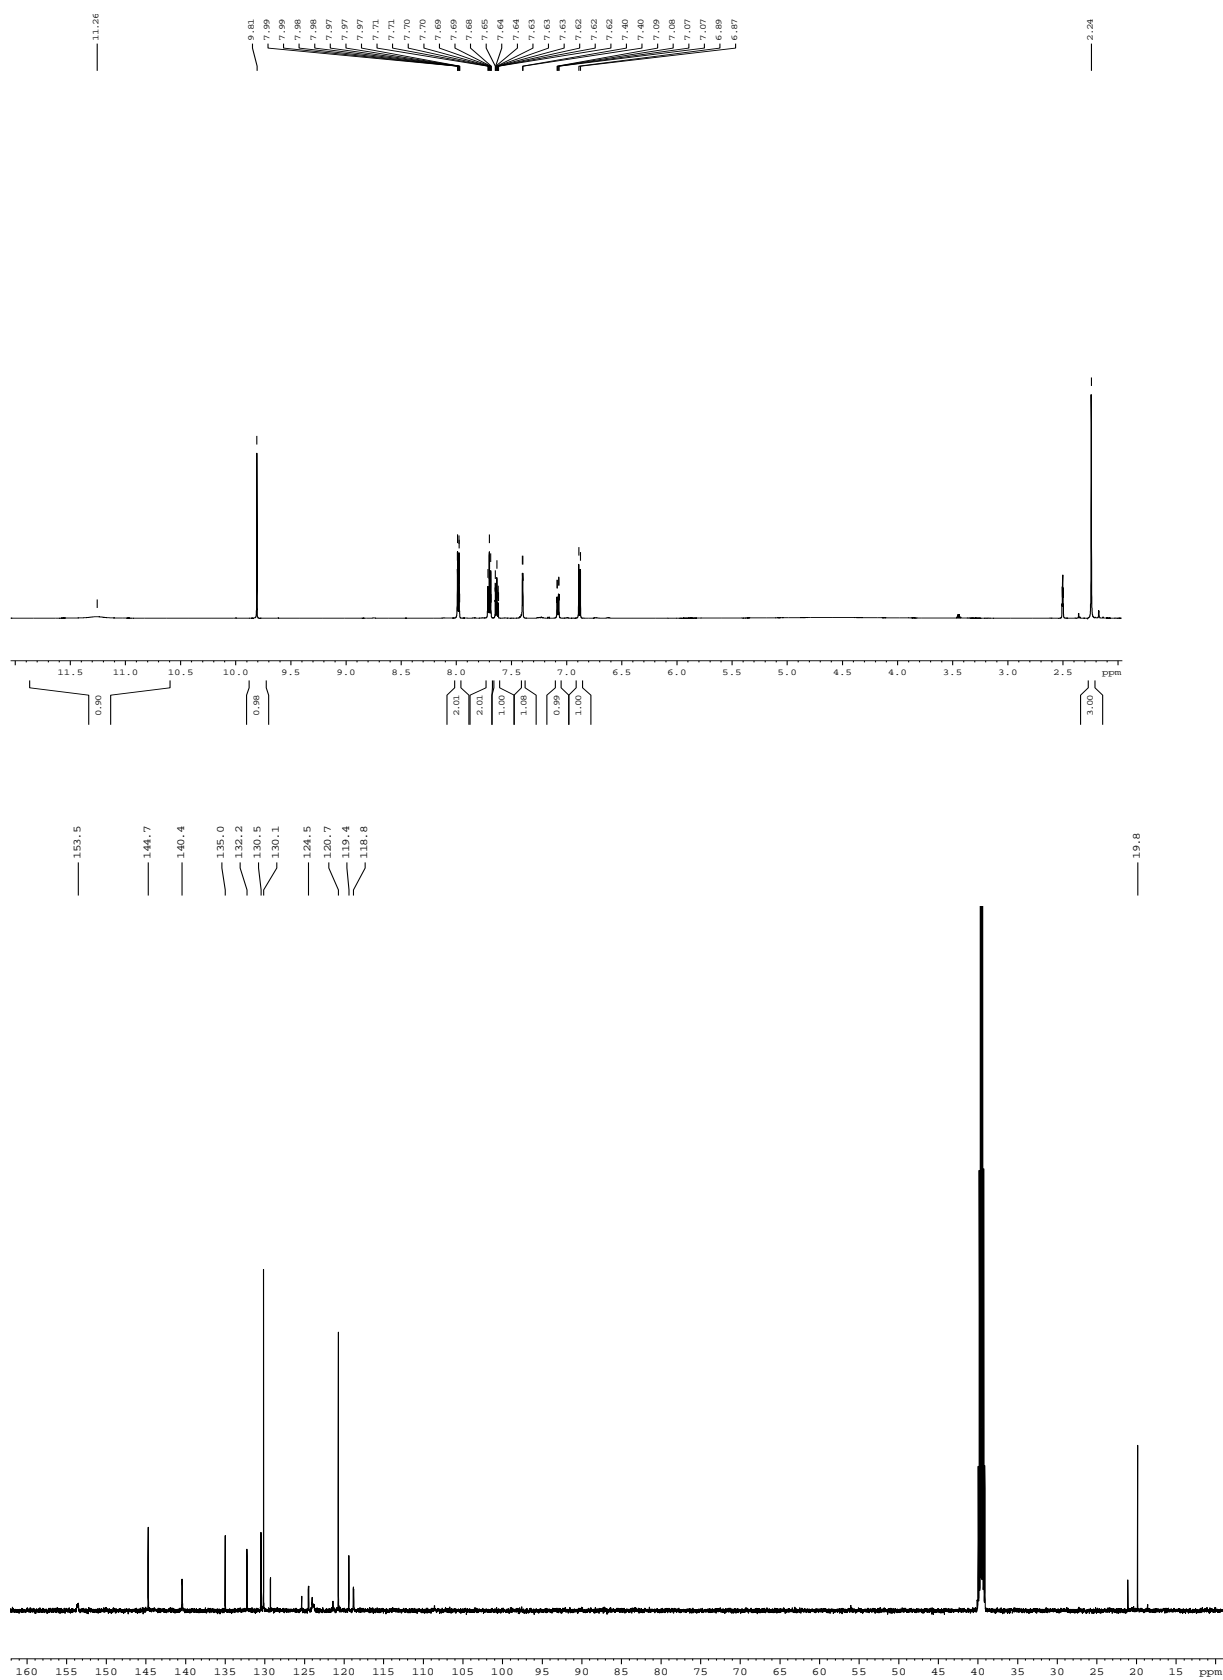

#### 4-(2-Hydroxyphenyl)-2-phenyl-2,4-dihydro-3H-1,2,4-triazole-3-thione 13a

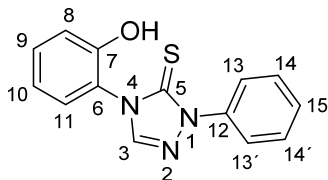

Method B: Under a nitrogen atmosphere a solution of 0.169 g (0.50 mmol) of 4-(2-hydroxyphenyl)-1-phenyl-4*H*-1,2,4-triazolium perchlorate and 19.2 mg (0.6 mmol) of sulfur in 10 mL of dry THF was cooled to 0 °C. Then, a solution of potassium 2-methylbutan-2-olate (0.32 mL, 0.55 mmol) was added slowly by using a syringe. The mixture was stirred at rt for 30 min and heated at 100 °C for 3 h. After cooling, the solvent was evaporated *in vacuo*. The product was separated by column chromatography (silica gel, ethyl acetate/petroleum ether). Yield: 0.079 g (59%) of a yellow solid, mp: 182 °C.

Method D: A flask was charged with 2-(1-phenyl-4*H*-1,2,4-triazolium-4-yl)phenolate (0.119 g, 0.5 mmol), sulfur (32 mg, 1.0 mmol), and dry toluene (10 mL). Then, the mixture was stirred at reflux temperature for 8 h. After evaporation, the resulting precipitate was purified by column chromatography (silica gel, ethyl acetate/petroleum ether). Yield: 0.135 g (50 %), mp: 182 °C.

<sup>1</sup>H NMR (400 MHz, MeOD-*d*<sub>4</sub>): δ = 8.43 (s, 1 H, 3-H), 8.01 - 8.04 (m, 2 H, 13/13'-H), 7.51 - 7.56 (m, 2 H, 14/14'-H), 7.42 - 7.46 (overlapped signals, 2 H, 15/11-H), 7.37 (ddd, *J*<sub>1</sub> = 1.7 Hz, *J*<sub>2</sub> = 7.5 Hz, *J*<sub>3</sub> = 8.3 Hz, 1 H, 9-H), 7.07 (dd, *J*<sub>1</sub> = 1.2 Hz, *J*<sub>2</sub> = 8.3 Hz, 1 H, 8-H), 7.01 (td, *J*<sub>1</sub> = 1.2 Hz, *J*<sub>2</sub> = 7.5 Hz, 1H, 10-H) ppm; <sup>13</sup>C NMR (100 MHz, MeOD-*d*<sub>4</sub>): δ = 168.1 (o, C-5), 154.0 (o, C-7), 143.5 (+, C-3), 139.9 (o, C-12), 132.2 (+ C-9), 130.4 (+, C-15), 129.8 (+, C-14/C-14'), 129.3 (+, C-11), 125.6 (+, C-13/C-13'), 123.1 (o, C-6), 120.8 (+, C-8), 118.0 (+, C-10) ppm; IR (ATR):  $\bar{\nu}$  = 3080, 1598, 1541, 1499, 1467, 1403, 1324, 1295, 1160, 961, 748, 715, 574 cm<sup>-1</sup>; MS (ESI 30 V): *m/z* (%) = 292.0 (100) [M+Na]<sup>+</sup>. HR-ESI-MS: calcd for C<sub>14</sub>H<sub>12</sub>N<sub>3</sub>OS<sup>+</sup> 270.0701. Found 270.0704.

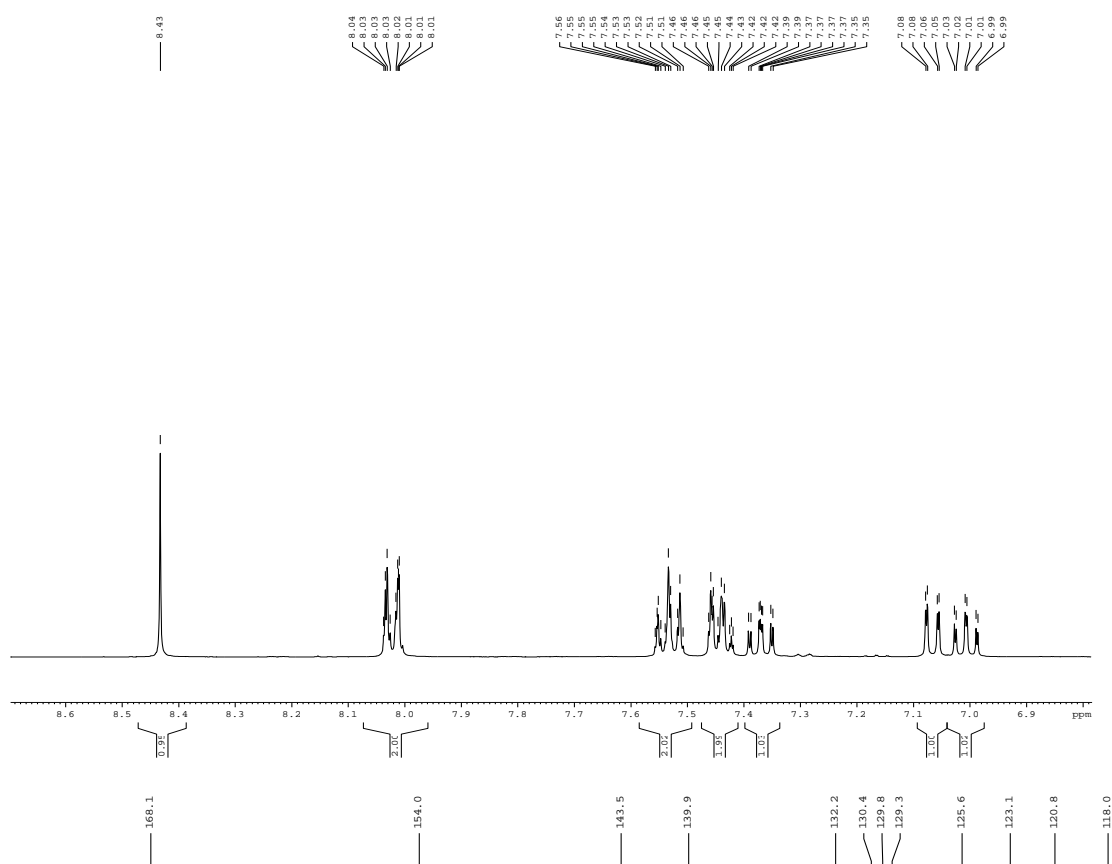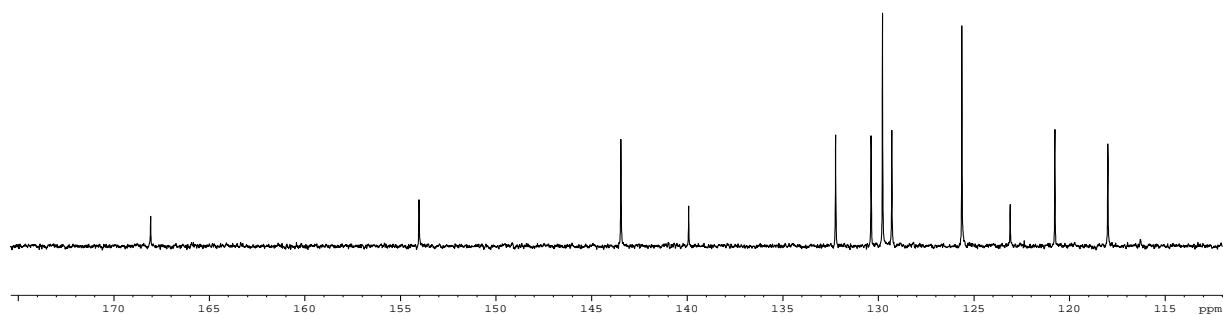

**4-(2-Hydroxyphenyl)-2-phenyl-2,4-dihydro-3H-1,2,4-triazole-3-selenone 13b**

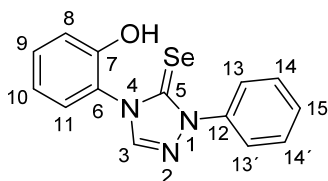

Under a nitrogen atmosphere a solution of 0.169 g (0.50 mmol) of 4-(2-hydroxyphenyl)-1-phenyl-4*H*-1,2,4-triazolium perchlorate and 47 mg (0.6 mmol) of selenium in 10 mL of dry THF was cooled to 0 °C. Then, a solution of potassium 2-methylbutan-2-olate (0.32 mL, 0.55 mmol) was added slowly by using a syringe. The mixture was stirred at rt for 30 min and then heated at 100 °C for 3 h. After cooling, the solvent was evaporated *in vacuo*. The product was separated by column chromatography (silica gel, ethyl acetate/petroleum ether). Yield: 0.079 g (50%) of a yellow solid, mp: 168 °C; <sup>1</sup>H NMR (400 MHz, DMSO-*d*<sub>6</sub>): δ = 10.32 (s, 1H, OH), 9.02 (s, 1H, 3-H), 8.02 - 8.04 (m, 2 H, 13/13'-H), 7.56 - 7.60 (m, 2 H, 14/14'-H), 7.45 - 7.52 (overlap, 2 H, 15/11-H), 7.38 (ddd, *J*<sub>1</sub> = 1.6 Hz, *J*<sub>2</sub> = 7.7 Hz, *J*<sub>3</sub> = 8.2 Hz, 1 H, 9-H), 7.09 (dd, *J*<sub>1</sub> = 1.1 Hz, *J*<sub>2</sub> = 8.2 Hz, 1 H, 8-H), 6.98 (td, *J*<sub>1</sub> = 1.1 Hz, *J*<sub>2</sub> = 7.7 Hz, 1 H, 10-H) ppm; <sup>13</sup>C NMR (100 MHz, DMSO-*d*<sub>6</sub>): δ = 161.3 (o, C-5), 152.6 (o, C-7), 144.4 (+, C-3), 138.6 (o, C-12), 131.0 (+, C-9), 129.7 (+, C-15), 128.8 (+, C-14/C-14'), 128.5 (+, C-11), 124.8 (+, C-13/C-13'), 122.2 (o, C-6), 119.0 (+, C-8), 116.8 (+, C-10) ppm; IR (ATR):  $\bar{\nu}$  = 3069, 1694, 1598, 1500, 1457, 1409, 1322, 1316, 1303, 962, 747, 692, 684, 549, 498 cm<sup>-1</sup>; MS (ESI 10 V): *m/z* (%) = 316.0 (100) [M-H]<sup>-</sup>. HR-ESI-MS: calcd for C<sub>14</sub>H<sub>13</sub>N<sub>3</sub>OSe<sup>+</sup> 318.0146. Found 318.0147.

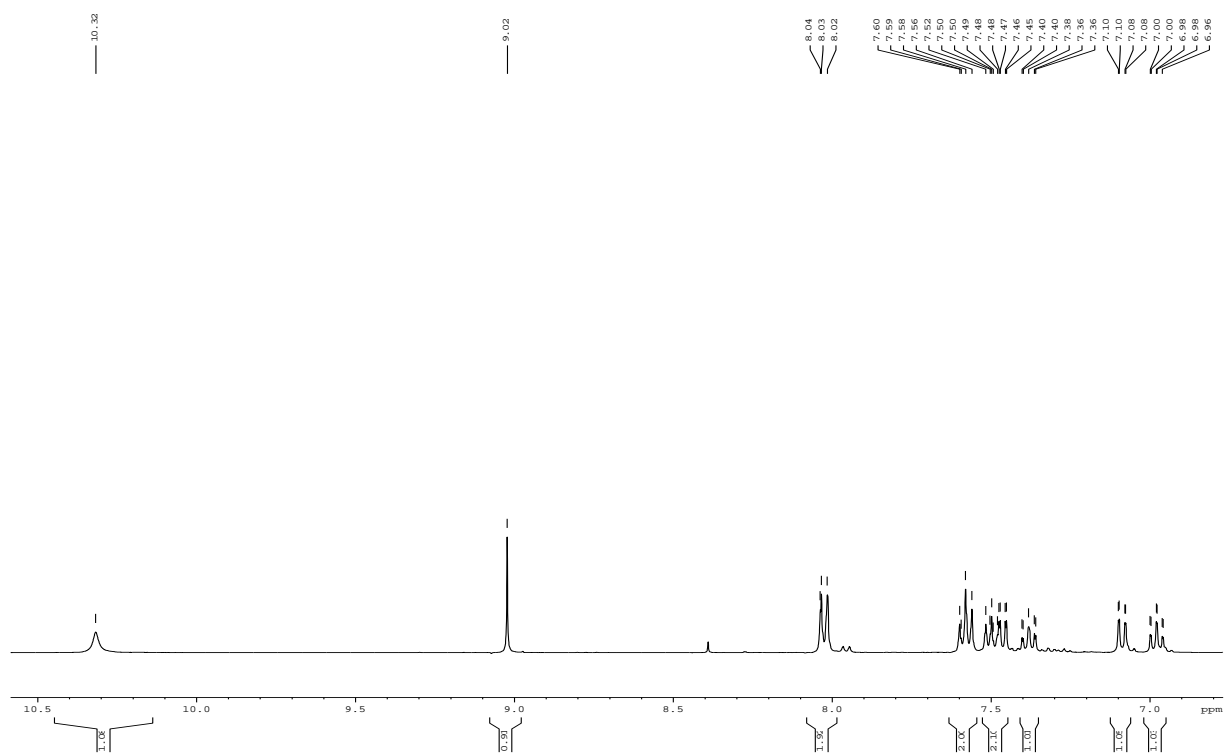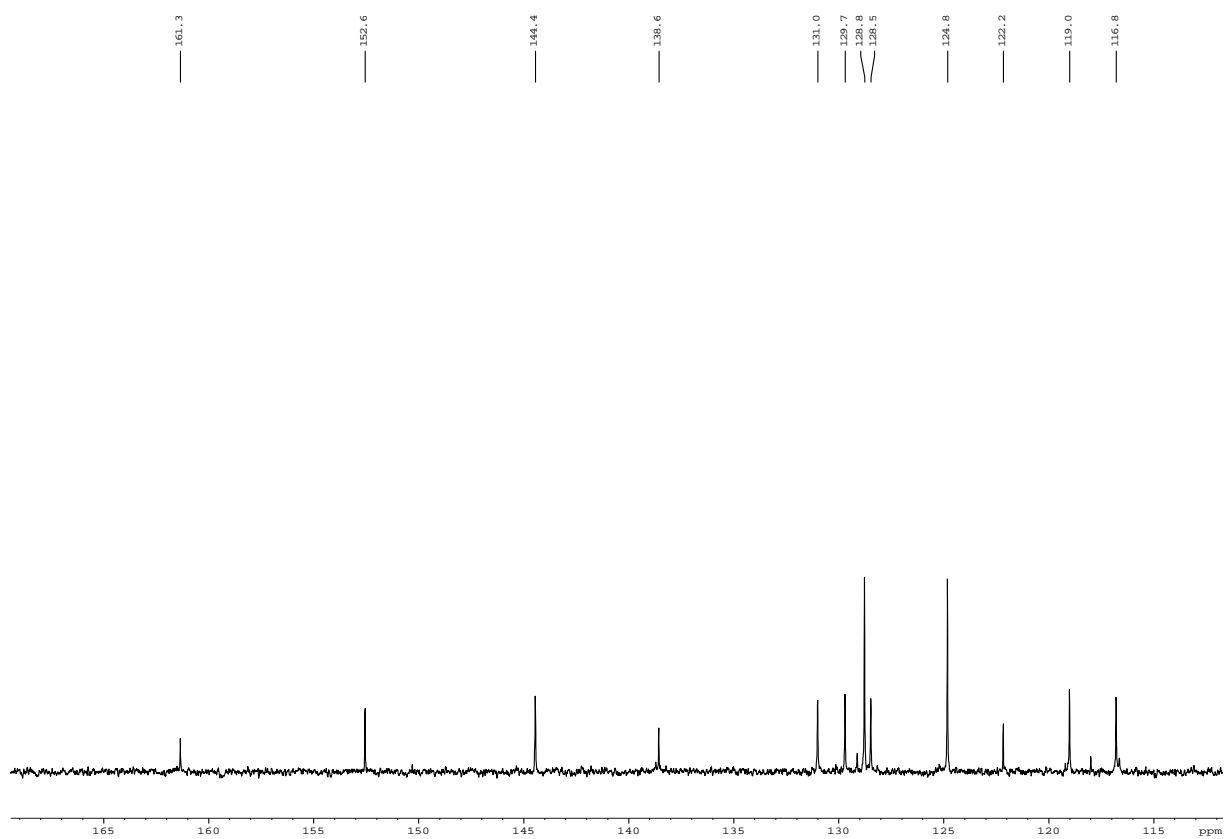

**4-(2-Hydroxy-5-methylphenyl)-2-phenyl-2,4-dihydro-3H-1,2,4-triazole-3-thione 13c**

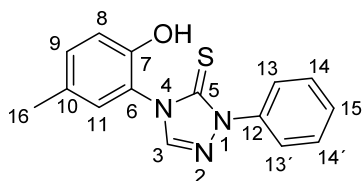

Method B: Under a nitrogen atmosphere a solution of 0.176 g (0.50 mmol) of 4-(2-hydroxy-5-methylphenyl)-1-phenyl-4*H*-1,2,4-triazolium perchlorate and 19.2 mg (0.6 mmol) of sulfur in 10 mL of dry THF was cooled to 0 °C. Then, a solution of potassium 2-methylbutan-2-olate (0.32 mL, 0.55 mmol) was added slowly by using a syringe. The mixture was stirred at rt for 30 min and then heated at 100 °C for 3 h. Then, the solvent was distilled off *in vacuo*. The product was purified by column chromatography (silica gel, ethyl acetate/petroleum ether). Yield: 0.112 g (79%) of a yellow solid, mp: 177 °C.

Method D: A flask was charged with 4-methyl-2-(1-phenyl-4*H*-1,2,4-triazolium-4-yl)phenolate (0.126 g, 0.5 mmol), sulfur (32 mg, 1.0 mmol), and dry toluene (10 mL), and then the mixture was stirred at reflux temperature for 8 h. After evaporation, the resulting precipitate was purified by column chromatography (silica gel, ethyl acetate/petroleum ether). Yield: 0.085 g (60%) of a yellow solid, mp: 177 °C.

<sup>1</sup>H NMR (400 MHz, MeOD-*d*<sub>4</sub>): δ = 8.391 (s, 1H, 3-H), 7.99 - 8.01 (m, 2 H, 13/13'-H), 7.50 - 7.53 (m, 2 H, 14/14'-H), 7.43 (tt, *J*<sub>1</sub> = 1.1 Hz, *J*<sub>2</sub> = 7.4 Hz, 1 H, 15-H), 7.23 (d, *J* = 1.9 Hz, 1 H, 11-H), 7.17 (dd, *J*<sub>1</sub> = 1.9 Hz, *J*<sub>2</sub> = 8.5 Hz, 1 H, 9-H), 6.94 (d, *J* = 8.5 Hz, 1 H, 8-H) ppm; <sup>13</sup>C NMR (100 MHz, MeOD-*d*<sub>4</sub>): δ = 167.2 (o, C-5), 150.8 (o, C-7), 142.7 (+, C-3), 139.1 (o, C-12), 131.9 (+, C-9), 129.7 (o, C-10), 129.5 (+, C-15), 129.0 (+, C-14/C-14'), 128.5 (+, C-11), 124.8 (+, C-13/ C-13'), 121.9 (o, C-6), 117.1 (+, C-8), 19.6 (+, C-16) ppm; IR (ATR):  $\bar{\nu}$  = 3145, 1542, 1517, 1501, 1400, 1311, 1288, 1261, 1183, 967, 807, 759, 692, 578, 548 cm<sup>-1</sup>. MS (ESI 30 V) *m/z* (%) = 306.0 (100) [M+Na]<sup>+</sup>. HR-ESI-MS: calcd for C<sub>15</sub>H<sub>14</sub>N<sub>3</sub>OS<sup>+</sup> 284.0858. Found 284.0860.

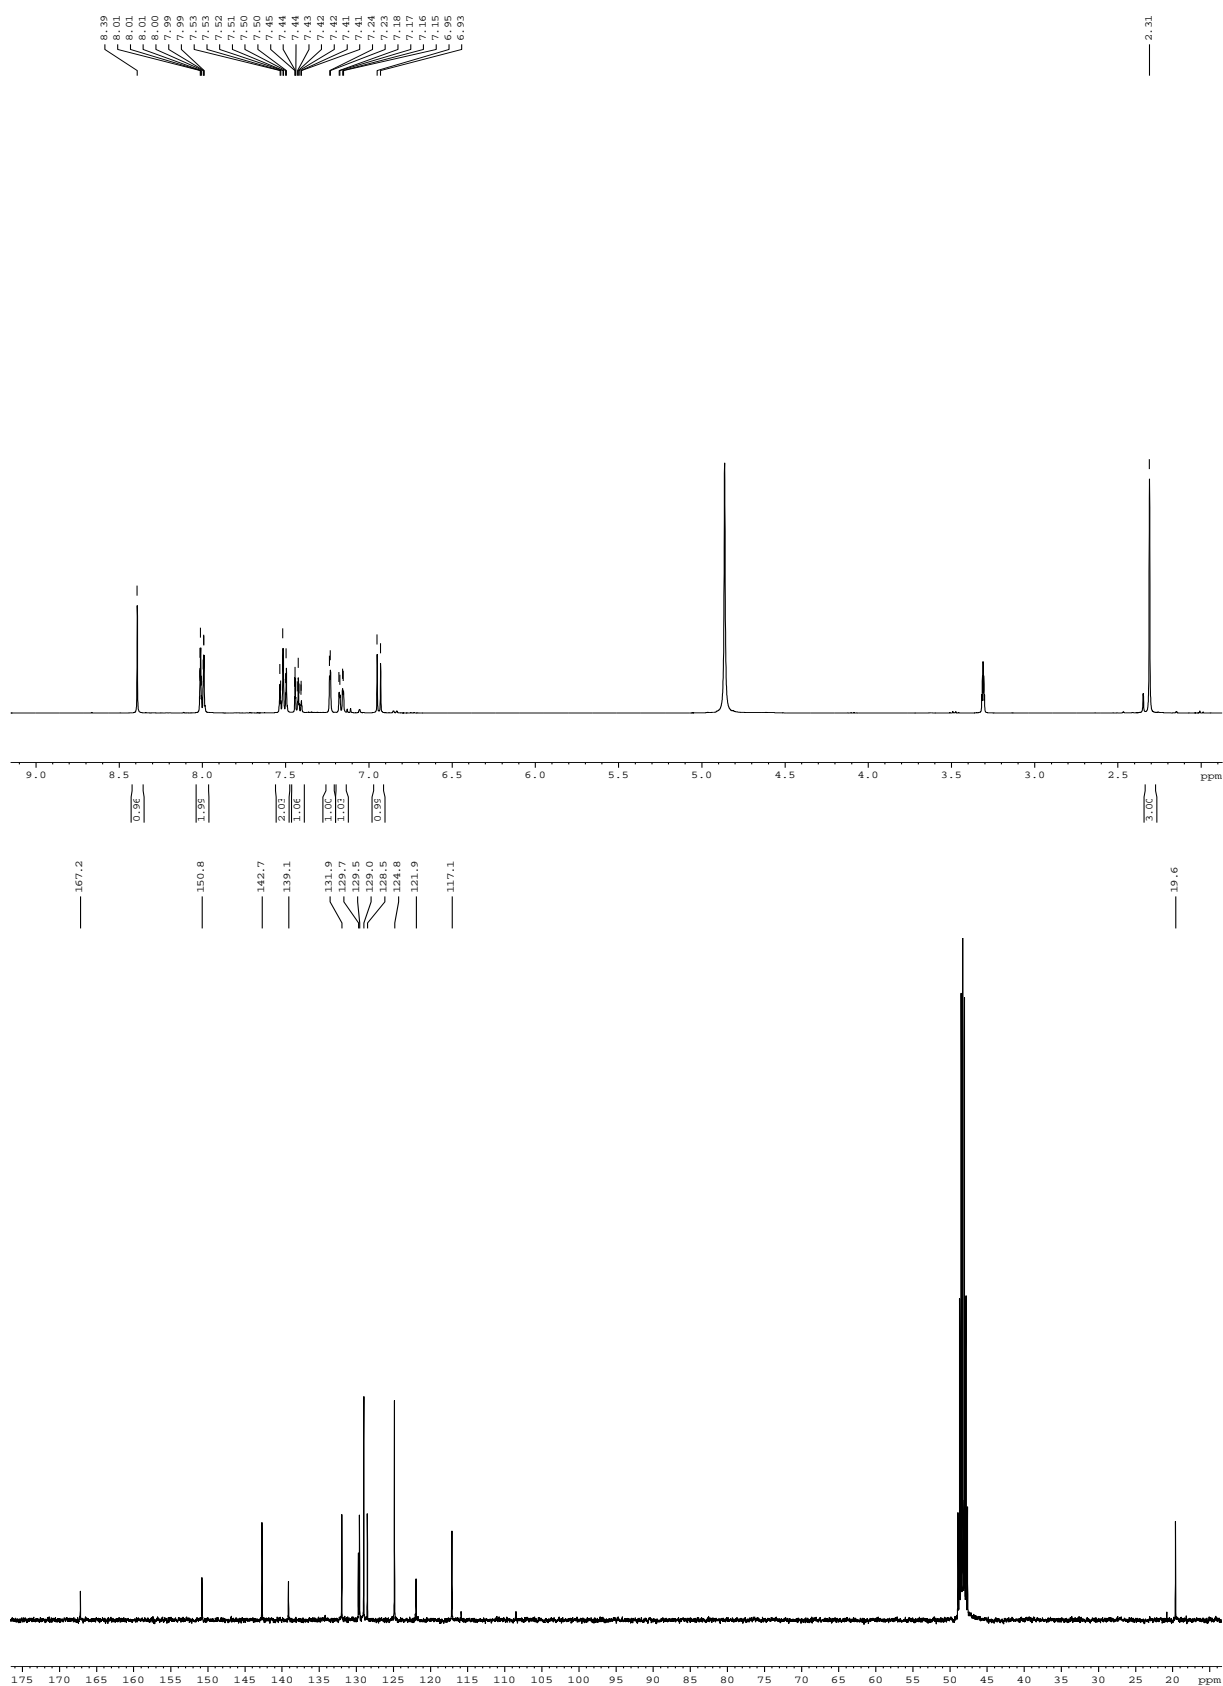

**4-(2-Hydroxy-5-methylphenyl)-2-phenyl-2,4-dihydro-3H-1,2,4-triazole-3-selenone 13d**

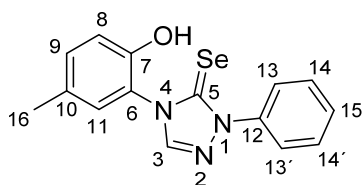

Under a nitrogen atmosphere a solution of 0.176 g (0.50 mmol) of 4-(2-hydroxy-5-methylphenyl)-1-phenyl-4*H*-1,2,4-triazolium perchlorate and 47 mg (0.6 mmol) of selenium in 10 mL of dry THF was cooled to 0 °C. Then, a solution of potassium 2-methylbutan-2-olate (0.32 mL, 0.55 mmol) was added slowly by using a syringe. The mixture was stirred at rt for 30 min and then heated at 100 °C for 3 h. After cooling, the solvent was evaporated *in vacuo*. The product was separated by column chromatography (silica gel, ethyl acetate/petroleum ether). Yield: 0.089 g (54%) of a yellow solid, mp: 137 °C; <sup>1</sup>H NMR (600 MHz, DMSO-*d*<sub>6</sub>): δ = 10.02 (s, 1 H, OH), 8.98 (s, 1 H, 3-H), 8.00 - 8.02 (m, 2 H, 13/13'-H), 7.56 - 7.59 (m, 2 H, 14/14'-H), 7.50 (tt, *J*<sub>1</sub> = 1.1 Hz, *J*<sub>2</sub> = 7.4 Hz, 1 H, 15-H), 7.25 (d, *J* = 1.9 Hz, 1 H, 11-H), 7.18 (ddd, *J*<sub>1</sub> = 0.5 Hz, *J*<sub>2</sub> = 1.9 Hz, *J*<sub>3</sub> = 8.3 Hz, 1 H, 9-H), 6.97 (d, *J* = 8.3 Hz, 1 H, 8-H), 2.26 (s, 3 H, 16-H) ppm; <sup>13</sup>C NMR (150 MHz, DMSO-*d*<sub>6</sub>): δ = 161.8 (o, C-5), 150.7 (o, C-7), 144.9 (+, C-3), 139.1 (o, C-12), 132.0 (+, C-9), 130.1 (+, C-11), 129.3 (+, C-14/C-14'), 129.0 (+, C-15), 128.3 (o, C-10), 125.3 (+, C-13/C-13'), 122.3 (o, C-6), 117.1 (+, C-8), 20.3 (+, C-16) ppm; IR (ATR):  $\bar{\nu}$  = 3067, 1694, 1516, 1500, 1405, 1309, 1273, 1181, 965, 811, 760, 693, 486 cm<sup>-1</sup>; MS (ESI 10 V) *m/z* (%) = 330.0 (100) [M-H]<sup>-</sup>.

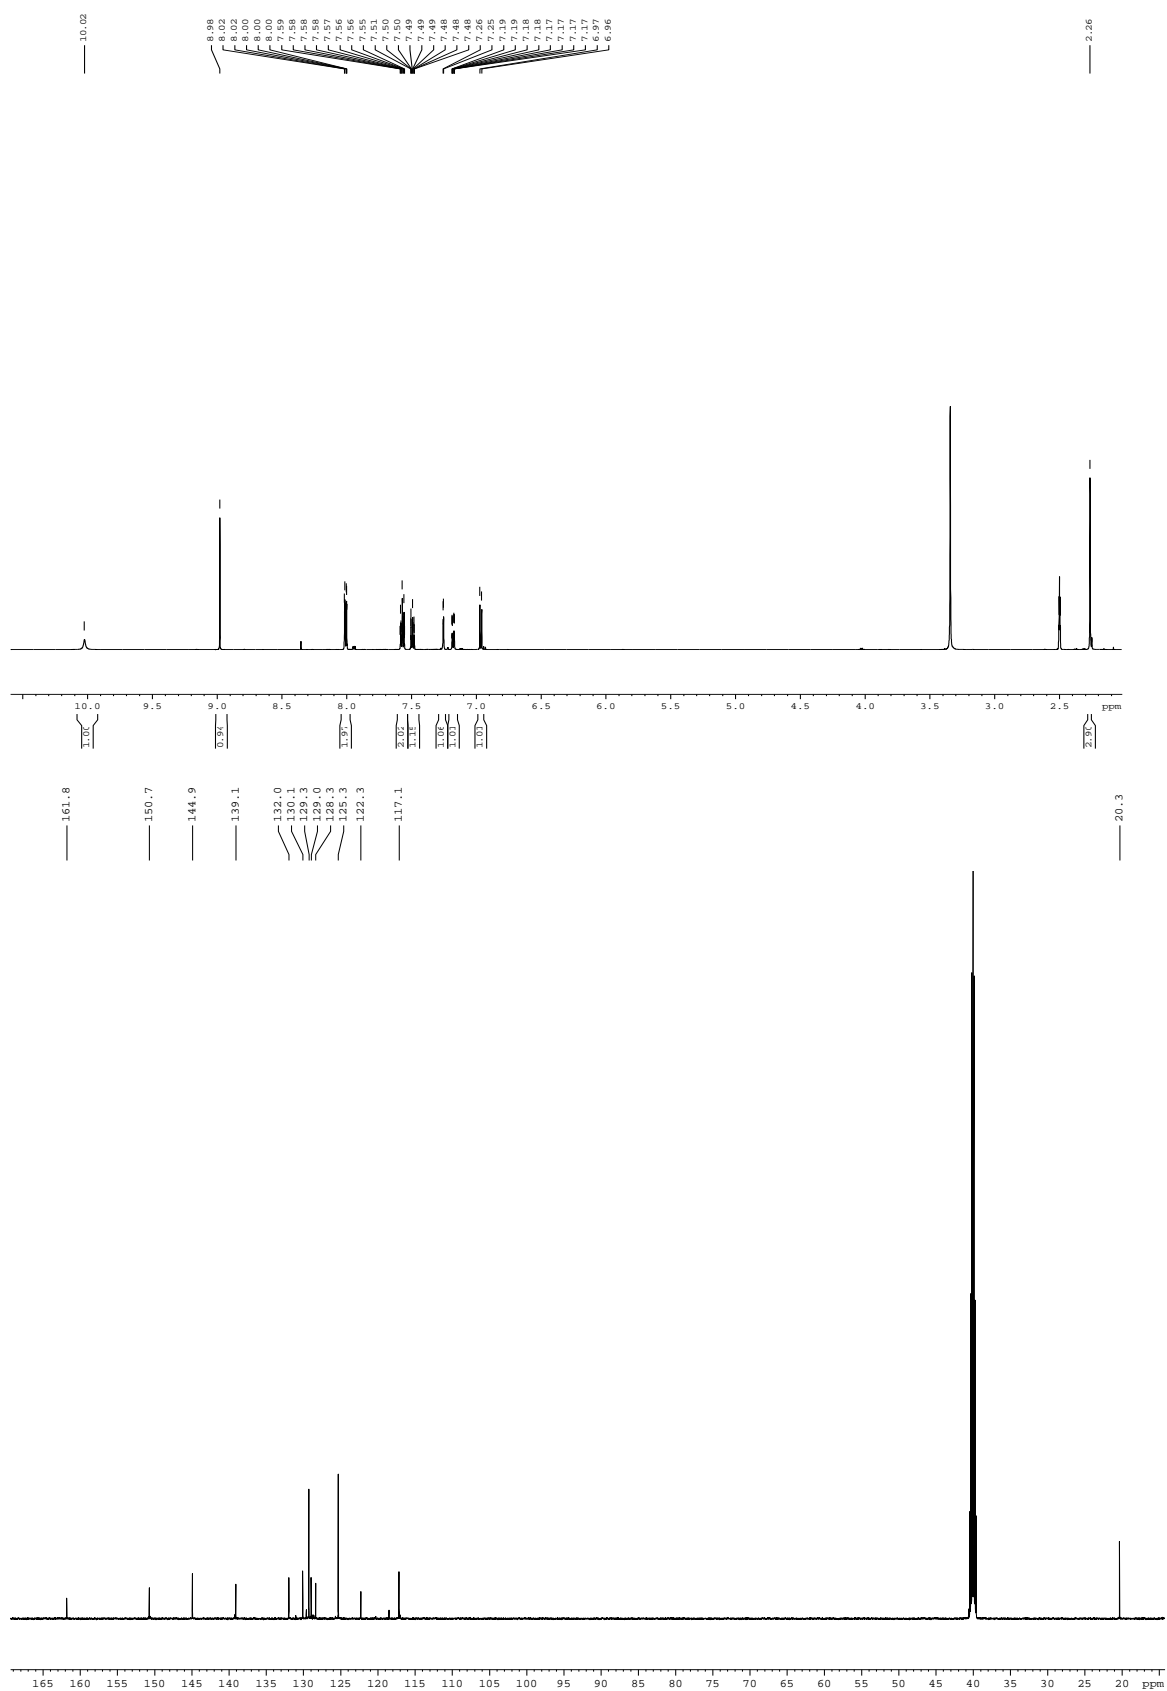

**Tris(perfluorophenyl)(2-(1-phenyl-4*H*-1,2,4-triazolium-4-yl)phenoxy)borate 14a**

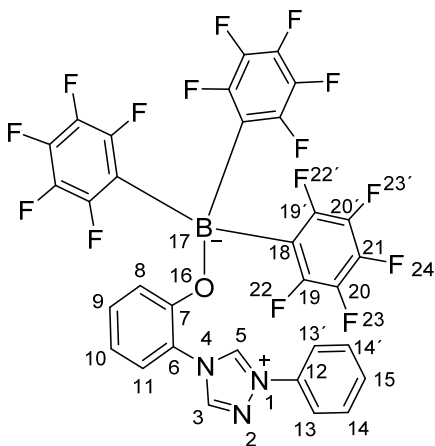

Under an inert atmosphere a solution of 0.119 g ( 0.50 mmol) of 2-(1-phenyl-4*H*-1,2,4-triazolium-4-yl)phenolate and 0.512 mg (1.0 mmol) of tris(pentafluorophenyl)borane in 10 mL of dry dioxane was stirred at rt for 2 h in a bomb tube. Then, the solvent was distilled off *in vacuo*. The product was separated by column chromatography (silica gel, ethyl acetate/petroleum ether). Yield: 0.281 g (75%) of a colorless solid, mp: 260 °C; <sup>1</sup>H NMR (600 MHz, DMSO-*d*<sub>6</sub>): δ = 11.02 (s, 1 H, 5-H), 9.51 (s, 1 H, 3-H), 7.91 - 7.92 (m, 2 H, 13/13'-H), 7.66 - 7.73 (overlapped signals, 4 H, 14/14'/15/11-H), 7.29 (ddd, *J*<sub>1</sub> = 1.7 Hz, *J*<sub>2</sub> = 7.8 Hz, *J*<sub>3</sub> = 8.5 Hz, 1 H, 9-H), 6.93 (dt, *J*<sub>1</sub> = 1.0 Hz, *J*<sub>2</sub> = 7.8 Hz, 1 H, 10-H), 6.62 (d, *J* = 8.5 Hz, 1 H, 8-H) ppm; <sup>13</sup>C NMR (150 MHz, DMSO-*d*<sub>6</sub>): δ = 152.7 (o, C-7), 148.0 (o, C-19), 146.4 (o, C-19'), 145.3 (+, C-3), 141.3 (+, C-5), 137.4 - 139.0 (C-21), 136.6 - 136.8 (C-20), 135.0-135.2 (C-20'), 134.6 (o, C-12), 131.5 (+, C-9), 130.8 (+, C-15), 130.3 (+, C-14/C-14'), 125.1 (+, C-11), 122.5 (o, C-6), 121.6 (o, C-18), 120.4 (+, C-13/C-13'), 118.0 (+, C-10), 117.3 (+, C-8) ppm; <sup>11</sup>B NMR (DMSO, 193 MHz, B(OMe)<sub>3</sub>): δ = -3.30 ppm; <sup>19</sup>F NMR (DMSO, 376 MHz, Cl<sub>3</sub>CF): δ = -133.44 (d, *J* = 22.37 Hz, 6 F, FC-22/FC-22'), -159.07 (t, *J* = 21.51 Hz, 3F, FC-24), -164.33 (t, *J* = 19.51 Hz, 6 F, FC-23/FC-23') ppm; IR (ATR):  $\bar{\nu}$  = 3150, 1565, 1512, 1483, 1277, 1087, 975, 965, 929, 764, 749, 690, 669, 549 cm<sup>-1</sup>; GC-MS: 237.0 (100) [M-B(C<sub>6</sub>F<sub>5</sub>)<sub>3</sub>].

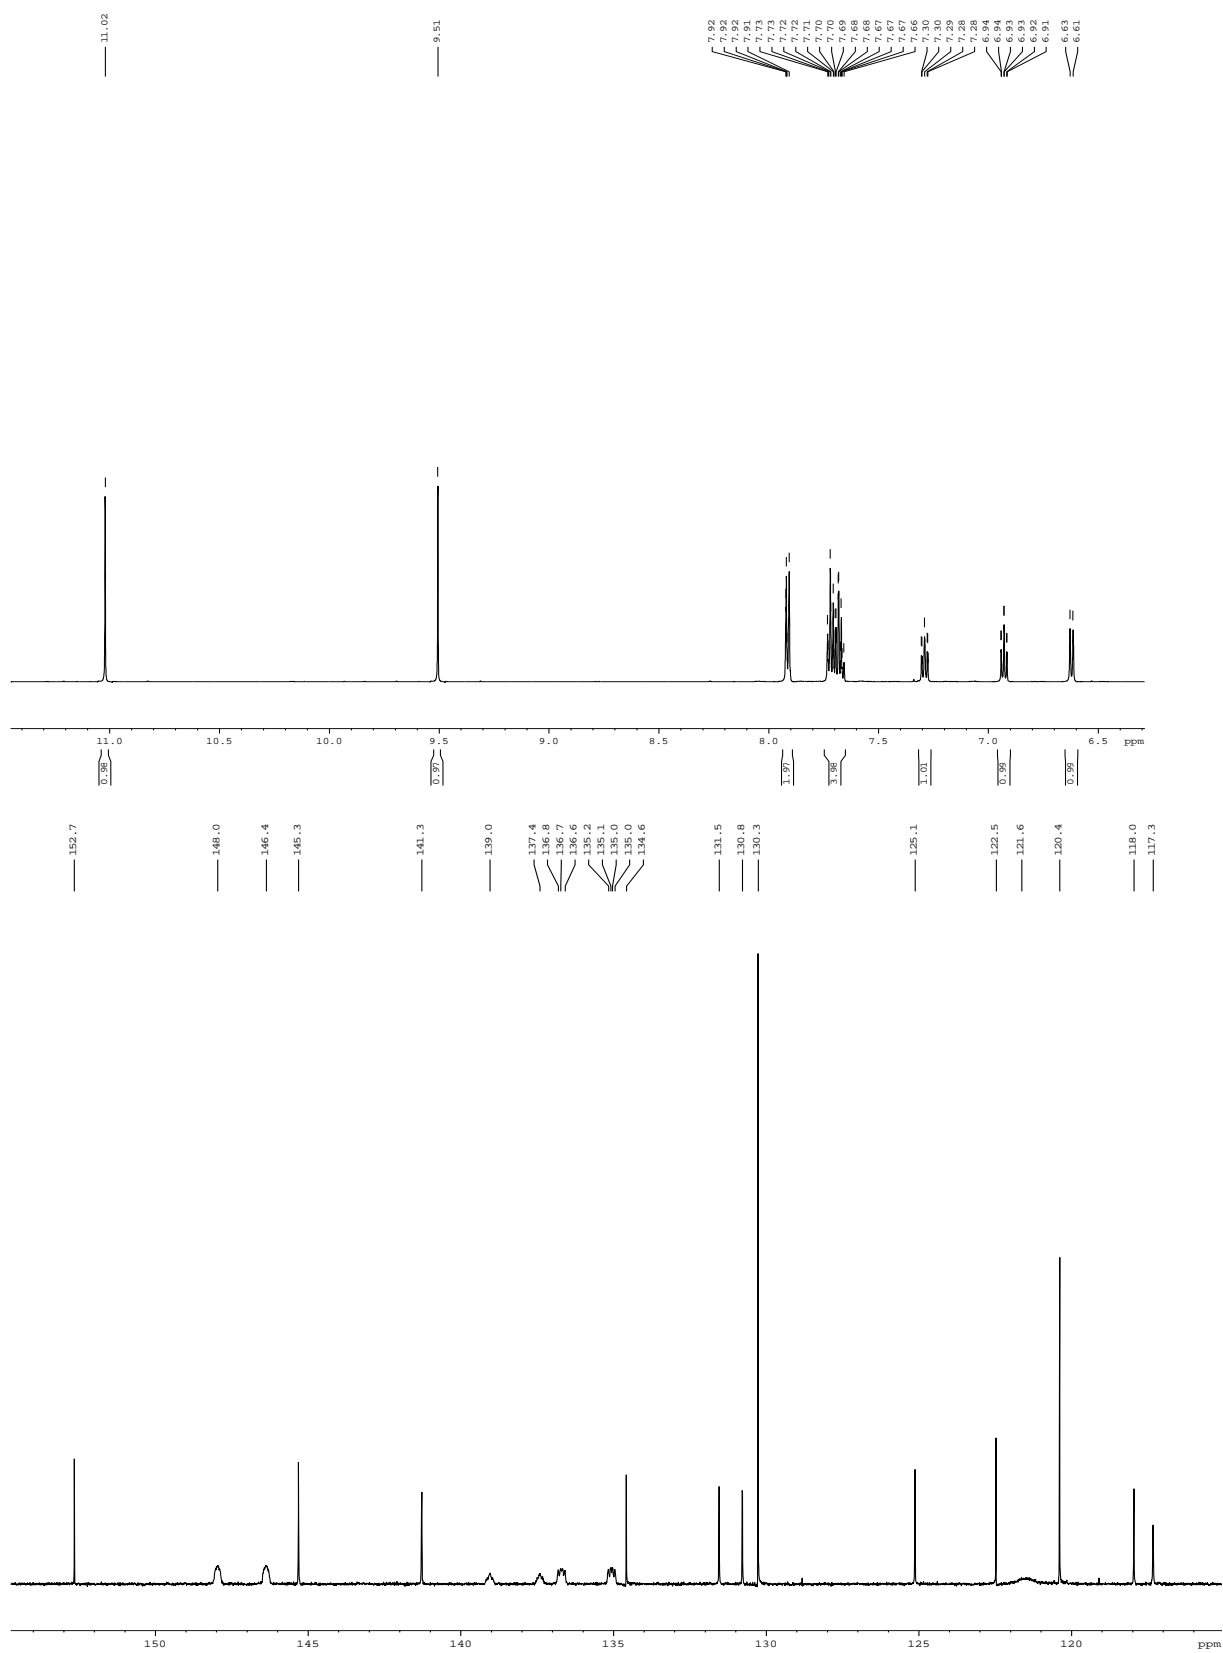

11B-NMR  
extern referenziert mit B(OMe)<sub>3</sub> @ 18.6ppm

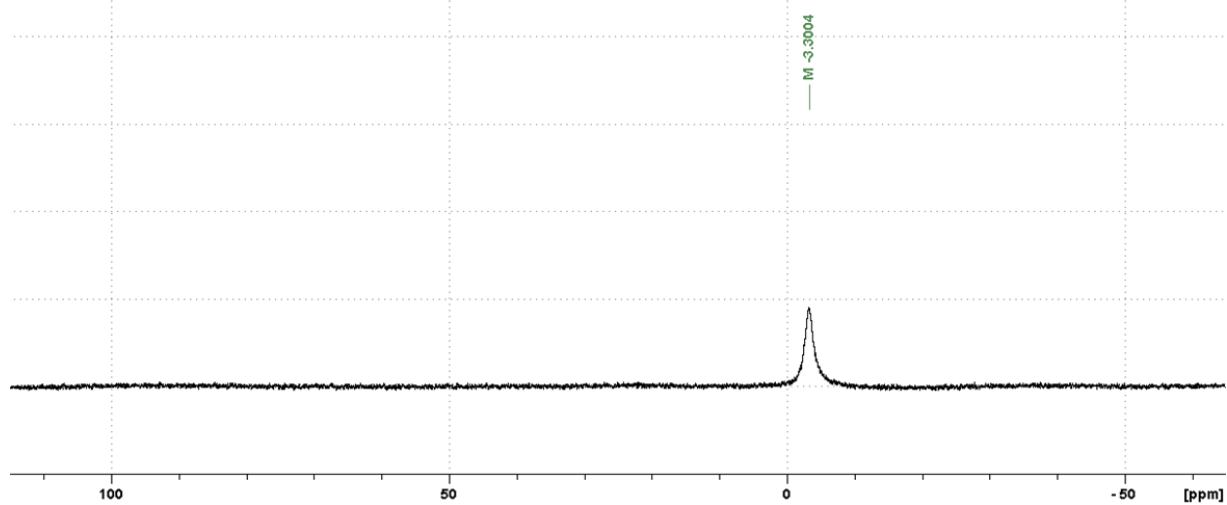

19F@376 MHz

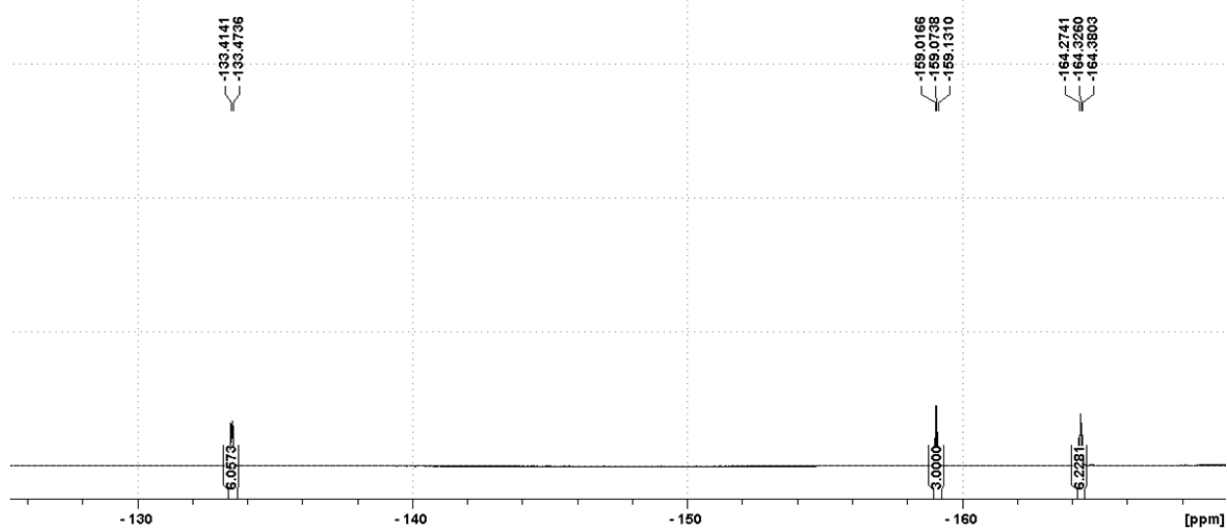

**Triphenyl(2-(1-phenyl-4*H*-1,2,4-triazolium-4-yl)phenoxy)borate 14b**

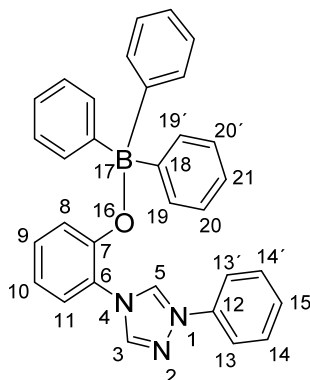

Under an inert atmosphere a solution of 0.242 g (1.0 mmol) of triphenylborane in 2 mL of dioxane was added to a suspension of 0.119 g (0.50 mmol) of 2-(1-phenyl-4*H*-1,2,4-triazolium-4-yl)phenolate in 5 mL of dry dioxane. The mixture was stirred at rt in a Schlenk-tube for 2 h. Then, the solvent was evaporated *in vacuo*. The resulting solid was purified by column chromatography (silica gel, ethyl acetate/petroleum ether). Yield: 0.321 g (67%) of a colorless solid, mp: 158 °C;  $^1\text{H}$  NMR (600 MHz, DMSO- $d_6$ ):  $\delta$  = 11.23 (s, 1 H, 5-H), 9.81 (s, 1 H, 3-H), 7.96 - 7.98 (m, 2 H, 13/13'-H), 7.71 - 7.74 (m, 2 H, 14/14'-H), 7.68 (tt,  $J_1$  = 1.1 Hz,  $J_2$  = 7.4 Hz, 1 H, 15-H), 7.58 (dd,  $J_1$  = 1.7 Hz,  $J_2$  = 7.9 Hz, 1 H, 11-H), 7.29 (dd,  $J_1$  = 1.3 Hz,  $J_2$  = 8.0 Hz, 6 H, 19/19'-H), 6.94 - 6.97 (overlapped signals, 7 H, 20/20'/9-H), 6.86 (tt,  $J_1$  = 1.3 Hz,  $J_2$  = 7.3 Hz, 3 H, 21-H), 6.67 (dd,  $J_1$  = 1.2 Hz,  $J_2$  =  $J_3$  = 7.9 Hz, 1 H, 10-H), 6.62 (dd,  $J_1$  = 1.2 Hz,  $J_2$  = 8.5 Hz, 1 H, 8-H) ppm;  $^{13}\text{C}$  NMR (150 MHz, DMSO- $d_6$ ):  $\delta$  = 157.2 (o, C-18), 155.4 (o, C-7), 145.2 (+, C-3), 141.2 (+, C-5), 134.9 (o, C-12), 133.0 (+, C-19/C-19'), 130.6 (+, C-15), 130.2 (+, C-14/C-14'), 126.0 (+, C-20/C-20'), 125.8 (+, C-9), 123.9 (+, C-11), 123.1 (+, C-21), 121.8 (o, C-6), 121.3 (+, C-8), 120.8 (+, C-13/C-13'), 115.0 (+, C-10) ppm;  $^{11}\text{B}$  NMR (DMSO, 193 MHz, B(OMe) $_3$ ):  $\delta$  = -6.56 ppm; IR (ATR):  $\bar{\nu}$  = 1601, 1557, 1497, 1311, 1115, 827, 806, 702, 684, 667, 612  $\text{cm}^{-1}$ ; MS (ESI 30 V):  $m/z$  (%) = 238.1 (100)  $[\text{M-B}(\text{C}_6\text{H}_5)_3 + \text{H}]^+$ .

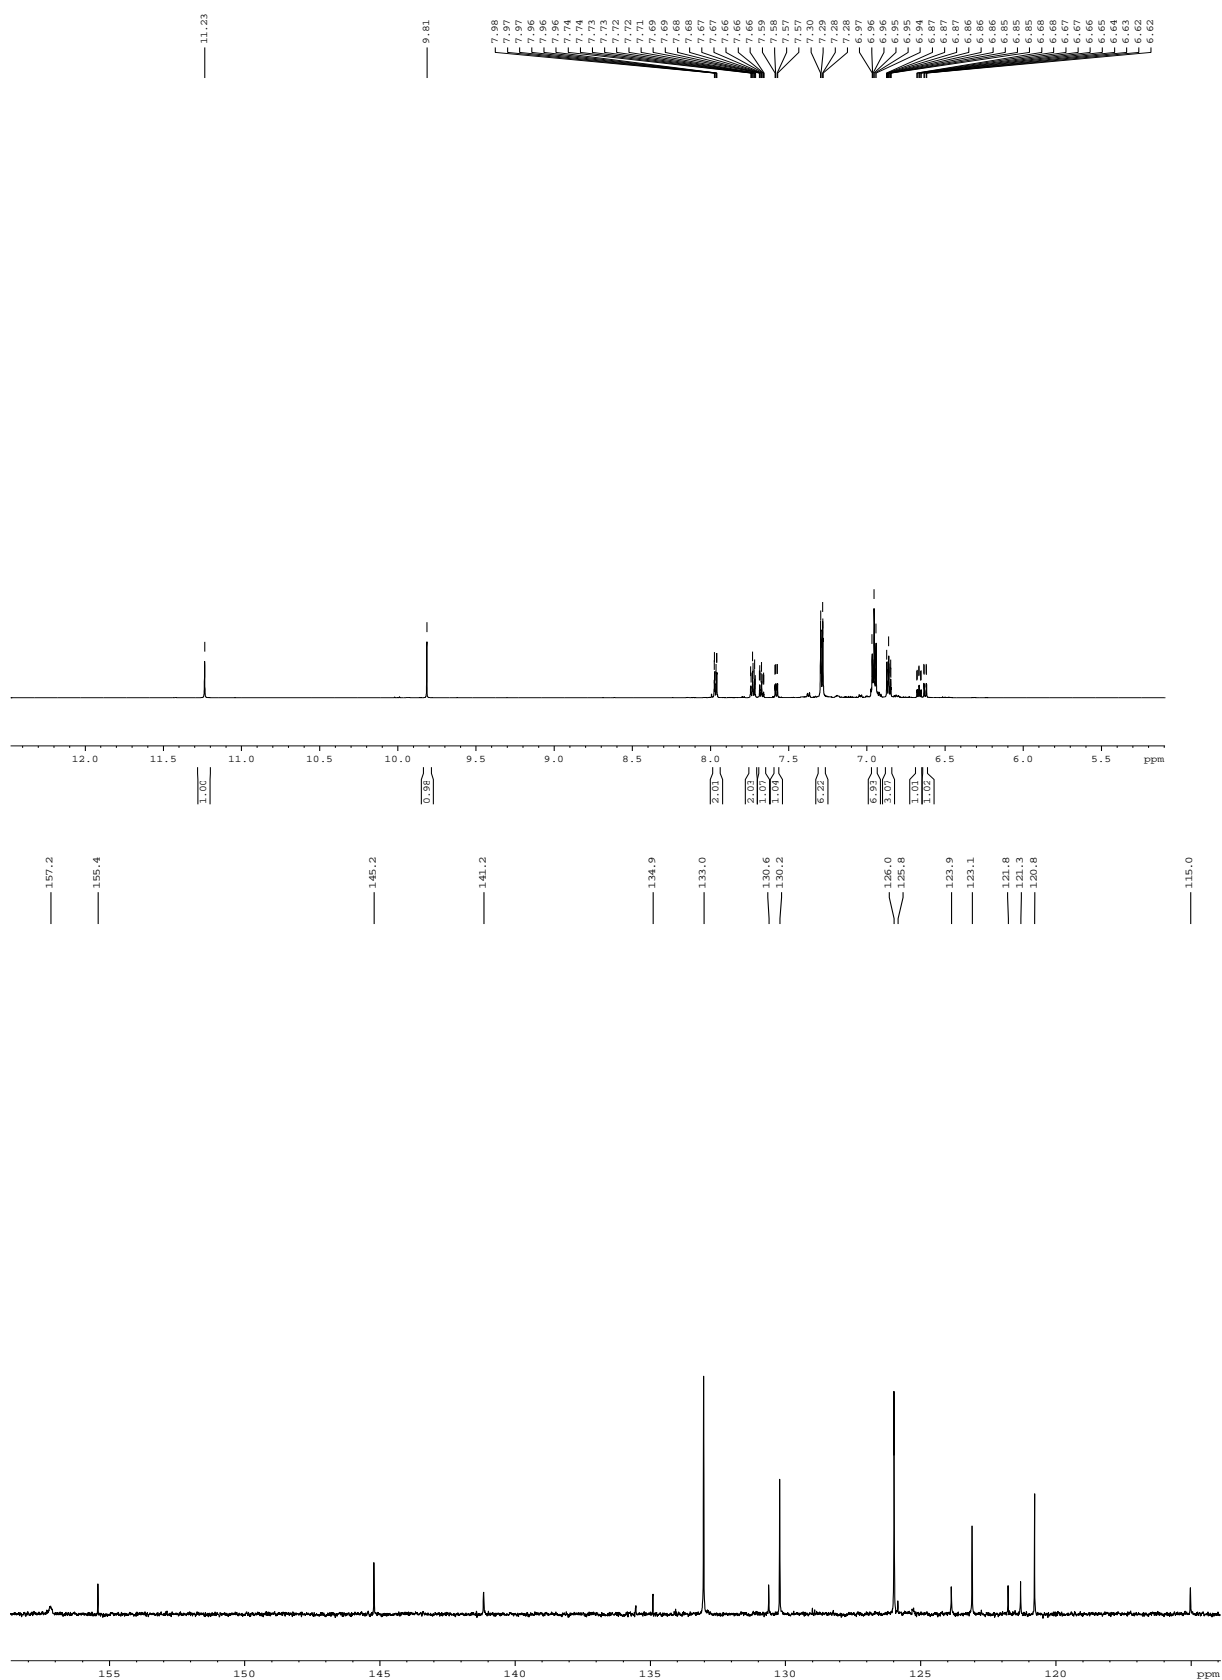

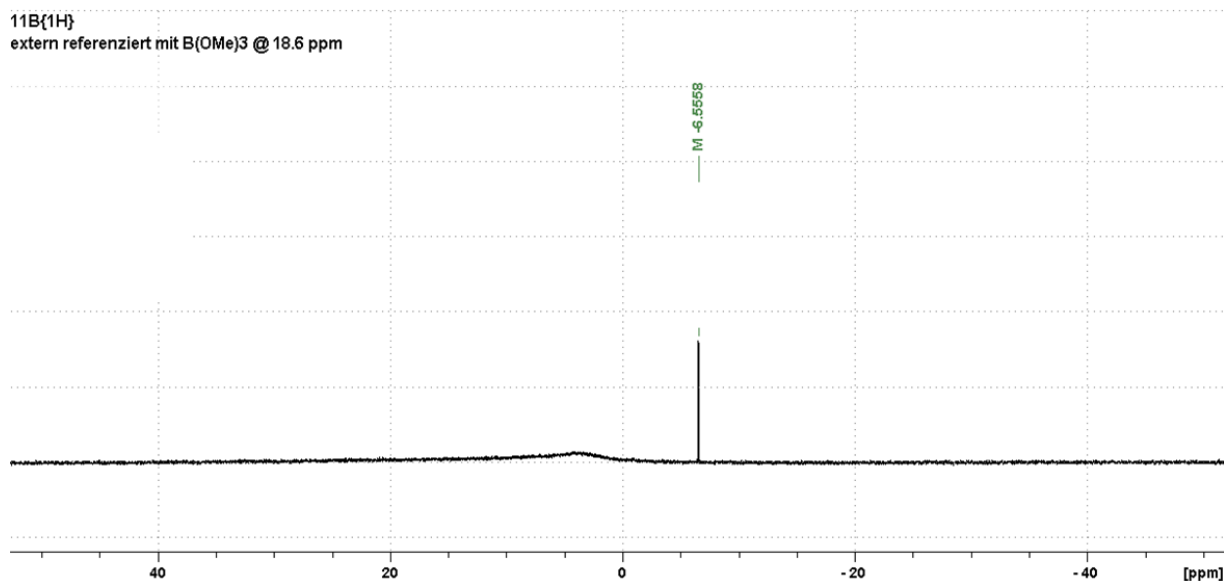

**(4-Methyl-2-(1-phenyl-4*H*-1,2,4-triazolium-4-yl)phenoxy)tris(perfluorophenyl)borate 14c**

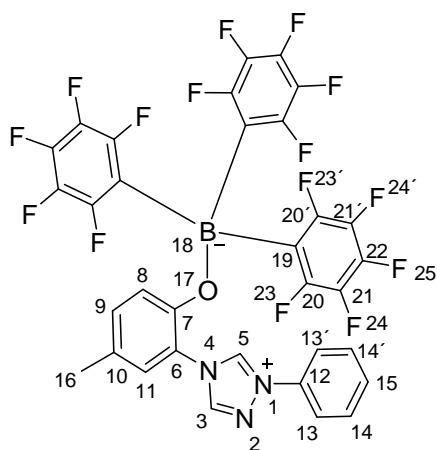

Under an inert atmosphere a solution of 0.126 g (0.50 mmol) of 2-(1-phenyl-4*H*-1,2,4-triazolium-4-yl)phenolate and 0.512 mg (1.0 mmol) of tris(pentafluorophenyl)borane in 10 mL of dry dioxane was stirred at rt for 2 h in a bomb tube. Then, the solvent was evaporated *in vacuo*. The resulting solid was purified by column chromatography (silica gel, ethyl acetate/petroleum ether). Yield: 0.298 g (78%) of a colorless solid, mp: 281 °C;  $^1\text{H}$  NMR (600 MHz,  $\text{DMSO}-d_6$ ):  $\delta$  = 11.00 (s, 1 H, 5-H), 9.49 (s, 1 H, 3-H), 7.91 - 7.92 (m, 2 H, 13/13'-H), 7.69 - 7.72 (m, 2 H, 14/14'-H), 7.66 (tt, ,  $J_1$  = 1.1 Hz,  $J_2$  = 7.4 Hz, 1 H, 15-

H), 7.53 (d,  $J = 2.0$  Hz, 1 H, 11-H), 7.08 (dd,  $J_1 = 2.0$  Hz,  $J_2 = 8.8$  Hz, 2 H, 9-H), 6.55 (d,  $J = 8.8$  Hz, 1 H, 8-H) ppm;  $^{13}\text{C}$  NMR (150 MHz, DMSO- $d_6$ ):  $\delta = 150.7$  (o, C-7), 148.5 (o, C-20), 146.9 (o, C-20'), 145.6 (+, C-3), 141.5 (+, C-5), 137.9 - 139.5 (o, C-22), 137.1 - 137.3 (o, C-21), 135.4 - 135.7 (o, C-21'), 135.1 (o, C-12), 132.3 (+, C-9), 131.2 (+, C-15), 130.7 (+, C-14/C-14'), 127.4 (o, C-10), 125.5 (+, C-11), 122.4 (o, C-6), 122.1 (o, C-19), 120.9 (+, C-13/C-13'), 117.7 (+, C-8), 20.2 (+, C-16) ppm;  $^{11}\text{B}$  NMR (DMSO, 193 MHz,  $\text{BF}_3 \cdot \text{Et}_2\text{O}$ ):  $\delta = -4.46$  ppm;  $^{19}\text{F}$  NMR (DMSO, 376 MHz,  $\text{Cl}_3\text{CF}$ ):  $\delta = -133.44$  (d,  $J = 22.64$  Hz, 6 F, FC-23 /FC-23'), -159.14 (t,  $J = 21.47$  Hz, 3F, FC-25), -164.36 (t,  $J = 20.08$  Hz, 6 F, FC-24/FC-24') ppm; IR (ATR):  $\bar{\nu} = 3163, 1514, 1457, 1277, 1089, 975, 965, 949, 941, 929, 916, 767, 759, 753, 667 \text{ cm}^{-1}$ ; MS (ESI 30 V):  $m/z$  (%) = 252.1 (100)  $[\text{M-B}(\text{C}_6\text{F}_5)_3 + \text{H}]^+$ .

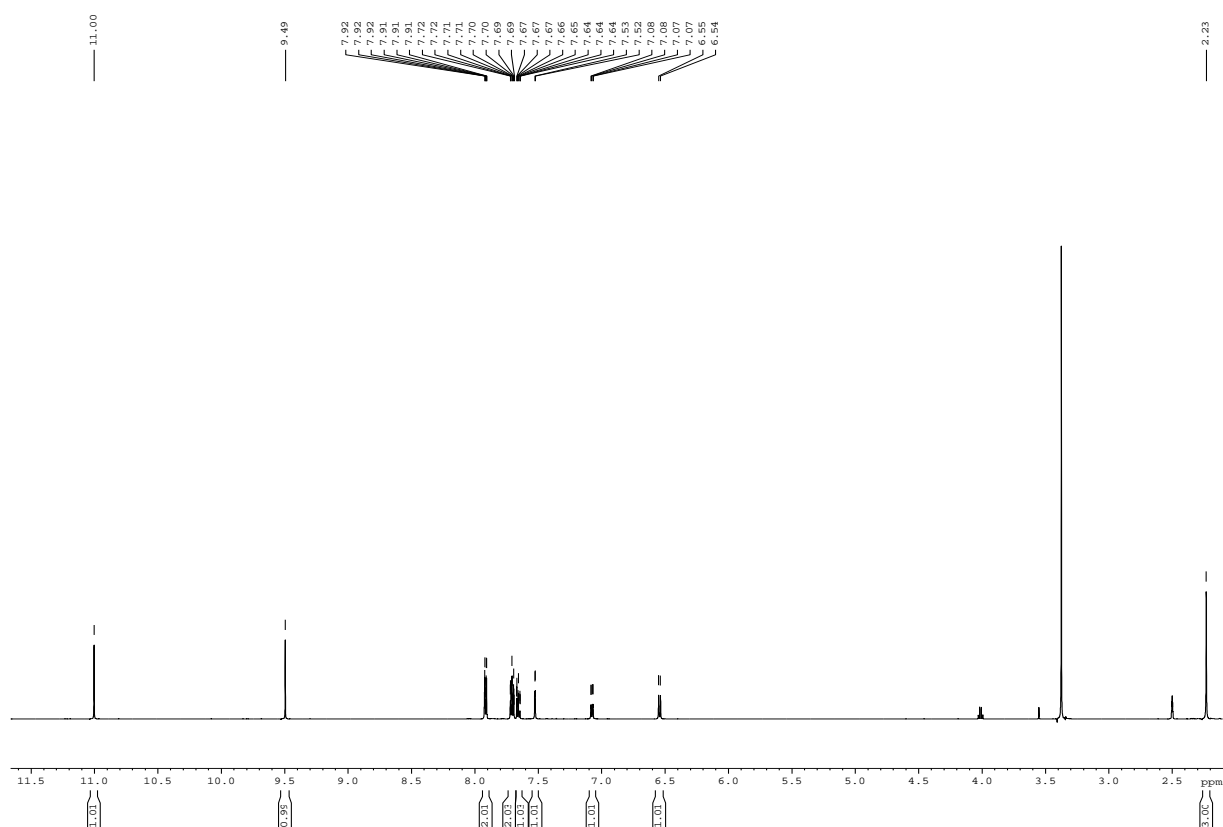

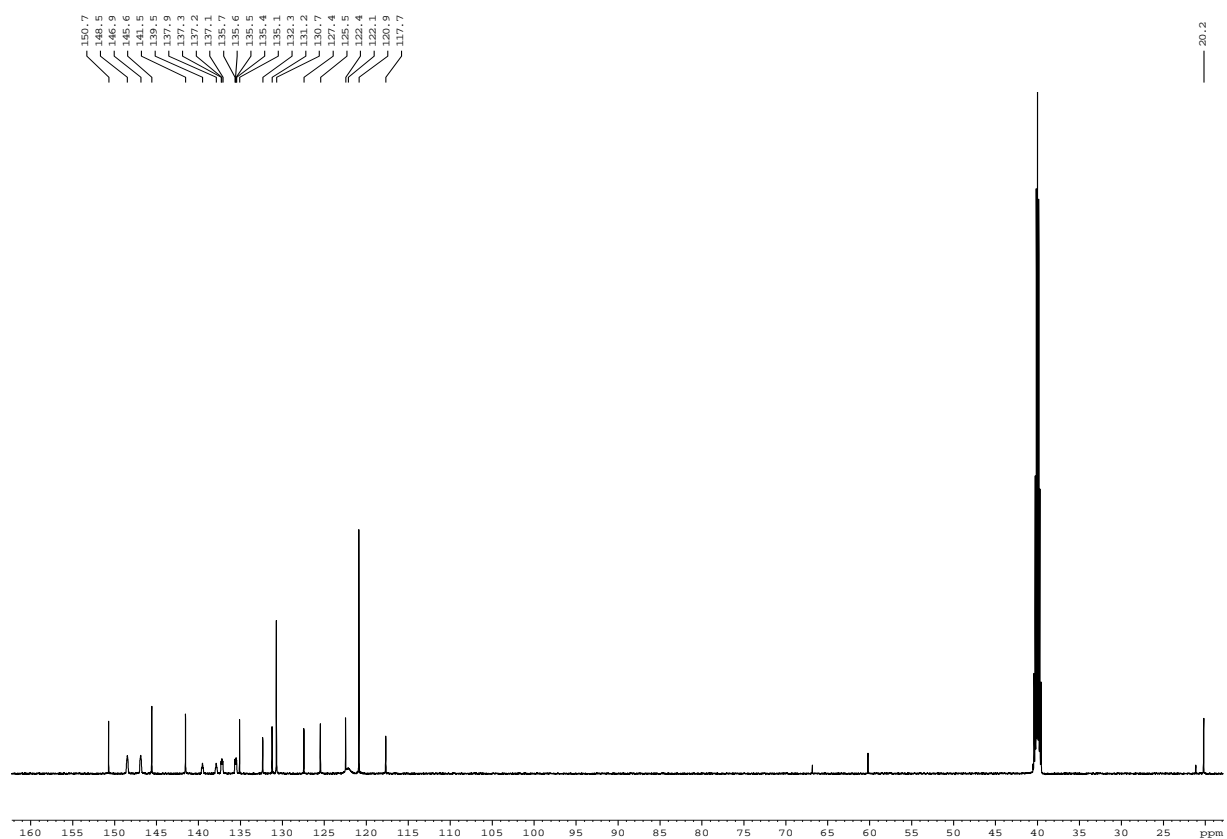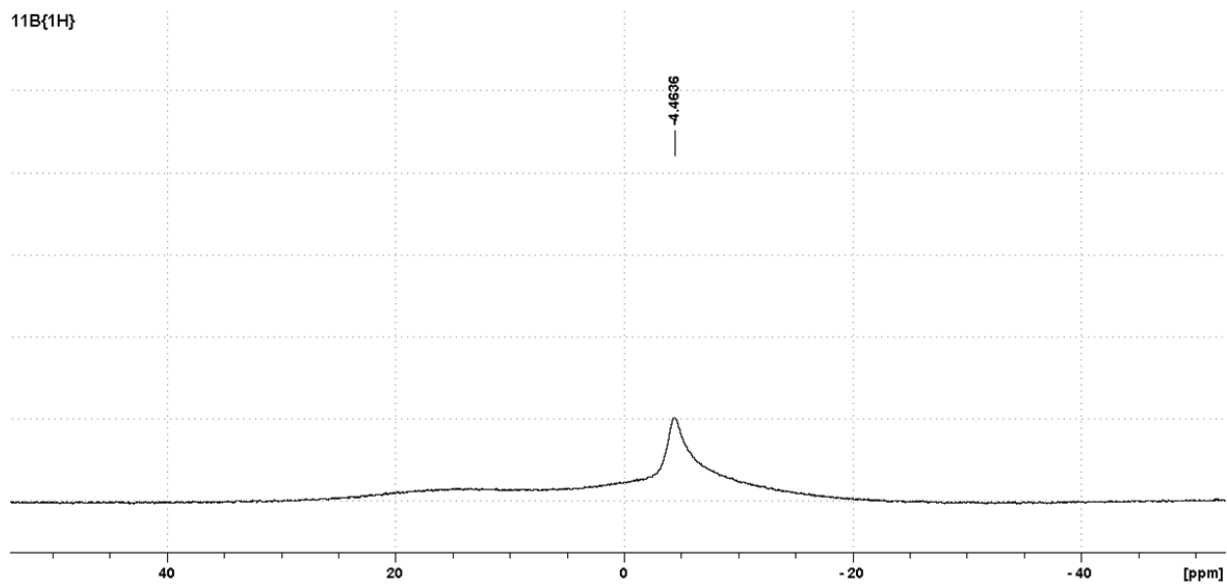

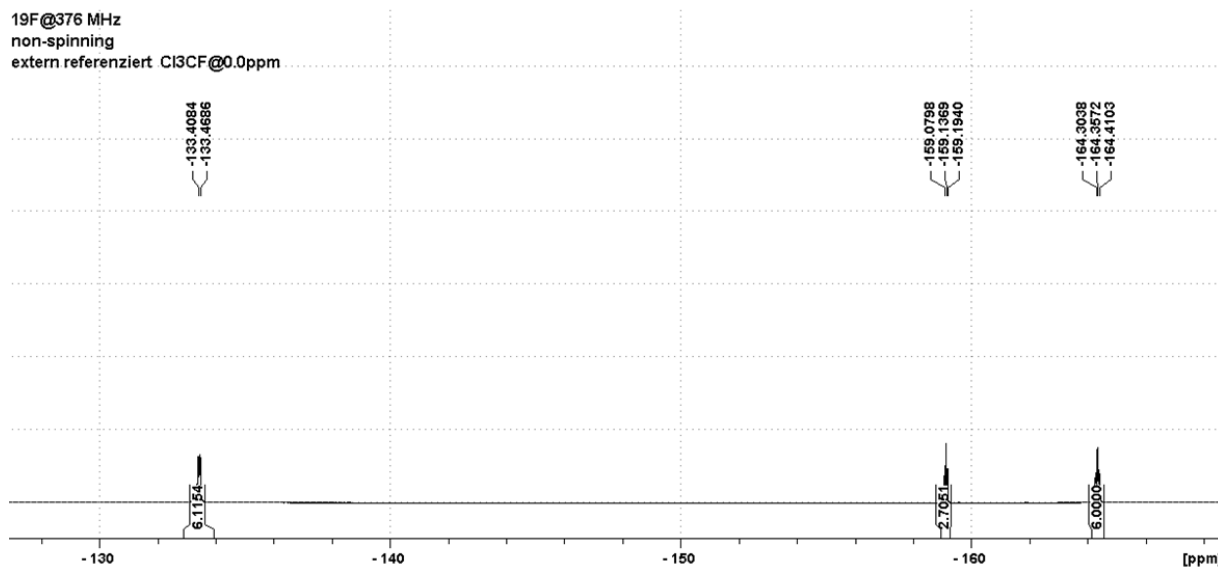

**(4-Methyl-2-(1-phenyl-4*H*-1,2,4-triazolium-4-yl)phenoxy)triphenylborate 14d**

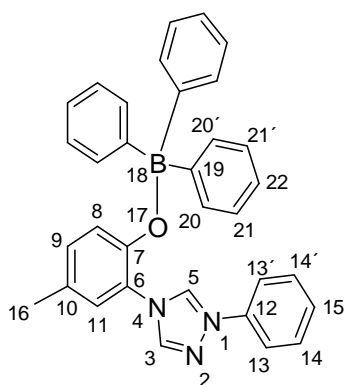

Under an inert atmosphere a solution of 0.242 g (1.0 mmol) of triphenylborane in 2 mL of anhydrous dioxane was added to a suspension of 0.126 g (0.50 mmol) of 2-(1-phenyl-4*H*-1,2,4-triazolium-4-yl)phenolate in 5 mL of anhydrous dioxane. The mixture was stirred at rt in a Schlenk-tube for 2 h. Then, the solvent was evaporated *in vacuo*. The resulting residue was purified by column chromatography (silica gel, ethyl acetate/petroleum ether). Yield: 0.355 g (72%) of a colorless solid, mp: 148 °C; <sup>1</sup>H NMR (600 MHz, DMSO-*d*<sub>6</sub>): δ = 11.20 (s, 1 H, 5-H), 9.79 (s, 1 H, 3-H), 7.95 (d, *J* = 7.9 Hz, 2 H, 13/13'-H), 7.71 - 7.73 (m, 2 H, 14/14'-H), 7.67 (tt, *J*<sub>1</sub> = 1.1 Hz, *J*<sub>2</sub> = 7.4 Hz, 1 H, 15-H), 7.40 (d, *J* = 1.83 Hz, 1 H, 11-H), 7.28 (dd, *J*<sub>1</sub> = 1.1 Hz, *J*<sub>2</sub> = 7.1 Hz, 6 H, 20/20'-H), 6.95 (t, *J* = 7.1 Hz, 6 H, 21/21'-H), 6.86 (tt, *J*<sub>1</sub> = 1.1 Hz, *J*<sub>2</sub> = 7.1 Hz, 3 H, 22-H), 6.77 (dd, 1 H, *J*<sub>1</sub> = 1.8 Hz, *J*<sub>2</sub> = 8.7 Hz, 9-H), 6.53 (d, *J* = 8.7 Hz, 1 H, 8-

H), 2.18 (s, 3H, 16-H) ppm;  $^{13}\text{C}$  NMR (150 MHz, DMSO- $d_6$ ):  $\delta$  = 157.4 (o, C-19), 156.0 (o, C-7), 144.9 (+, C-3), 140.8 (+, C-5), 134.9 (o, C-12), 133.0 (+, C-20/C-20'), 130.7 (+, C-9), 130.6 (+, C-15), 130.2 (+, C-14/C-14'), 125.9 (+, C-21/C-21'), 123.8 (o, C-10), 123.6 (+, C-11), 123.0 (+, C-22), 121.3 (o, C-6), 121.2 (+, C-8), 120.7 (+, C-13/C-13'), 19.7 (+, C-16) ppm;  $^{11}\text{B}$  NMR (DMSO, 193 MHz,  $\text{BF}_3 \cdot \text{Et}_2\text{O}$ ):  $\delta$  = -6.57 ppm; IR (ATR):  $\bar{\nu}$  = 3120, 1566, 1520, 1292, 1284, 1094, 1072, 870, 845, 752, 699, 684, 666, 621, 482  $\text{cm}^{-1}$ ; MS (ESI 30 V):  $m/z$  (%) = 252.1 (100)  $[\text{M}-\text{B}(\text{C}_6\text{H}_5)_3+\text{H}]^+$ .

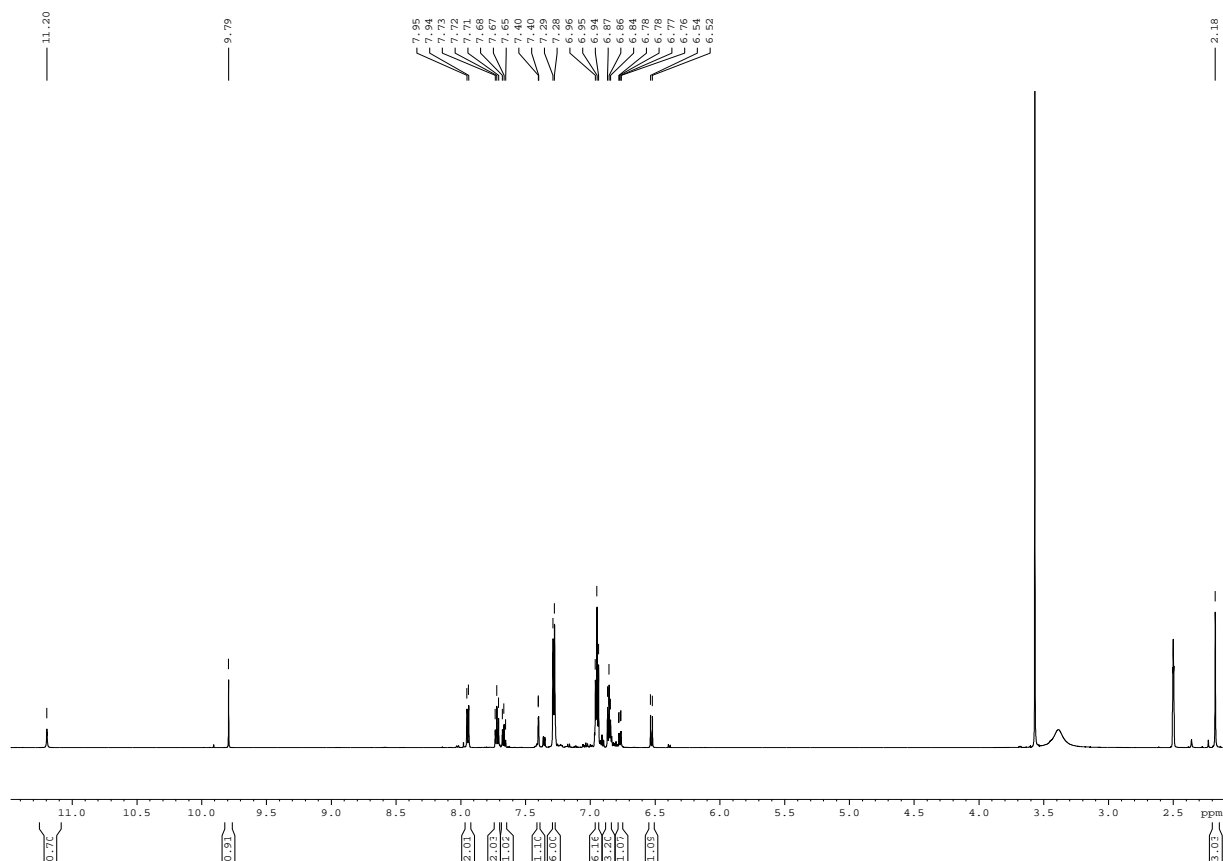

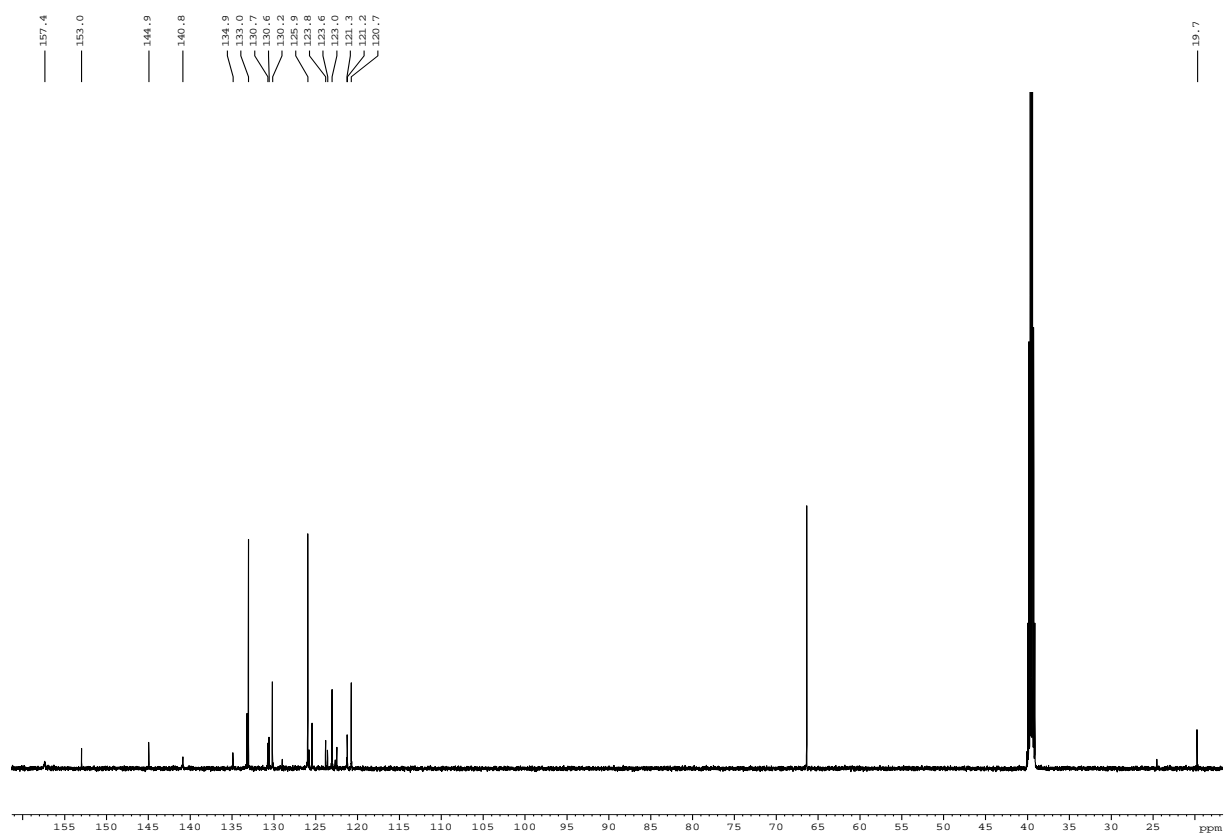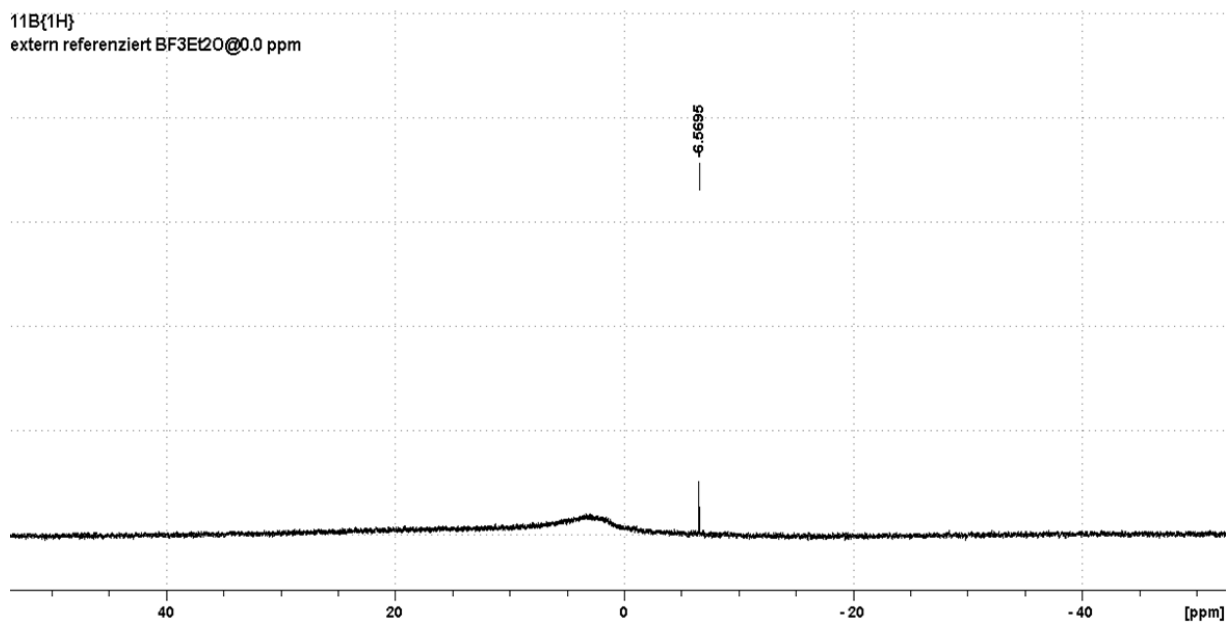

**4,4-Diethyl-3-phenyl-4*H*-benzo[*e*][1,2,4]triazolo[3,4-*c*][1,4,2]oxazaborinin-3-ium-4-ide 15a**

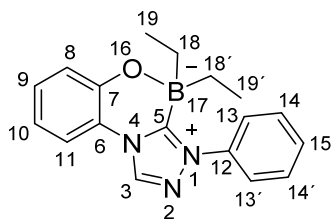

Under an inert atmosphere a solution of 460 mg (5 mmol) of triethylborane in 2 mL of anhydrous dioxane was added to a suspension of 0.119 g (0.50 mmol) of 2-(1-phenyl-4*H*-1,2,4-triazolium-4-yl)phenolate in 5 mL of anhydrous dioxane. The mixture was stirred at 100 °C in a Schlenk-tube for 8 h. After cooling to rt the mixture was diluted with dioxane and subjected to column chromatography (silica gel, ethyl acetate/petroleum ether). Yield: 0.122 g (80%) of a colorless solid, mp: 143 °C; <sup>1</sup>H NMR (400 MHz, CDCl<sub>3</sub>): δ = 8.63 (s, 1 H, 3-H), 7.52 - 7.60 (m, 5 H, 13/13'/14/14'/15-H), 7.33 (dd, *J*<sub>1</sub> = 1.7 Hz, *J*<sub>2</sub> = 7.8 Hz, 1 H, 11-H), 7.24 (ddd, *J*<sub>1</sub> = 1.7 Hz, *J*<sub>2</sub> = 7.8 Hz, *J*<sub>3</sub> = 8.3 Hz, 1 H, 9-H), 7.12 (dd, *J*<sub>1</sub> = 1.3 Hz, *J*<sub>2</sub> = 8.3 Hz, 1 H, 8-H), 6.81 (td, *J*<sub>1</sub> = 1.3 Hz, *J*<sub>2</sub> = 7.8 Hz, 1 H, 10-H), 0.63 (t, *J* = 7.7 Hz, 6 H, 19/19'-H), 0.37 - 0.47 (overlapped signals, 2 H, 18/18'-H), 0.21 - 0.30 (overlap, 2 H, 18/18'-H) ppm; <sup>13</sup>C NMR (100 MHz, CDCl<sub>3</sub>): δ = 153.2 (o, C-7), 137.4 (o, C-12), 136.1 (+, C-13), 130.5 (+, C-15), 130.1 (+, C-9), 129.2 (+, C-13/C-13'), 125.5 (+, C-14/C-14'), 121.3 (o, C-6), 121.2 (+, C-8), 117.0 (+, C-10), 115.9 (+, C-11), 14.6 (-, C-18/C-18'), 9.9 (+, C-19/C-19') ppm; <sup>11</sup>B NMR (CDCl<sub>3</sub>, 193 MHz, BF<sub>3</sub>·Et<sub>2</sub>O): δ = -1.97 ppm; IR (ATR):  $\bar{\nu}$  = 2864, 1506, 1460, 1306, 1292, 1146, 1036, 978, 883, 816, 750, 688, 659 cm<sup>-1</sup>; MS (ESI 30 V): *m/z* (%) = 238.1 (100) [M+Na]<sup>+</sup>. HR-ESI-MS: calcd for C<sub>18</sub>H<sub>21</sub>N<sub>3</sub>O<sup>+</sup> 306.1778. Found 306.1775.

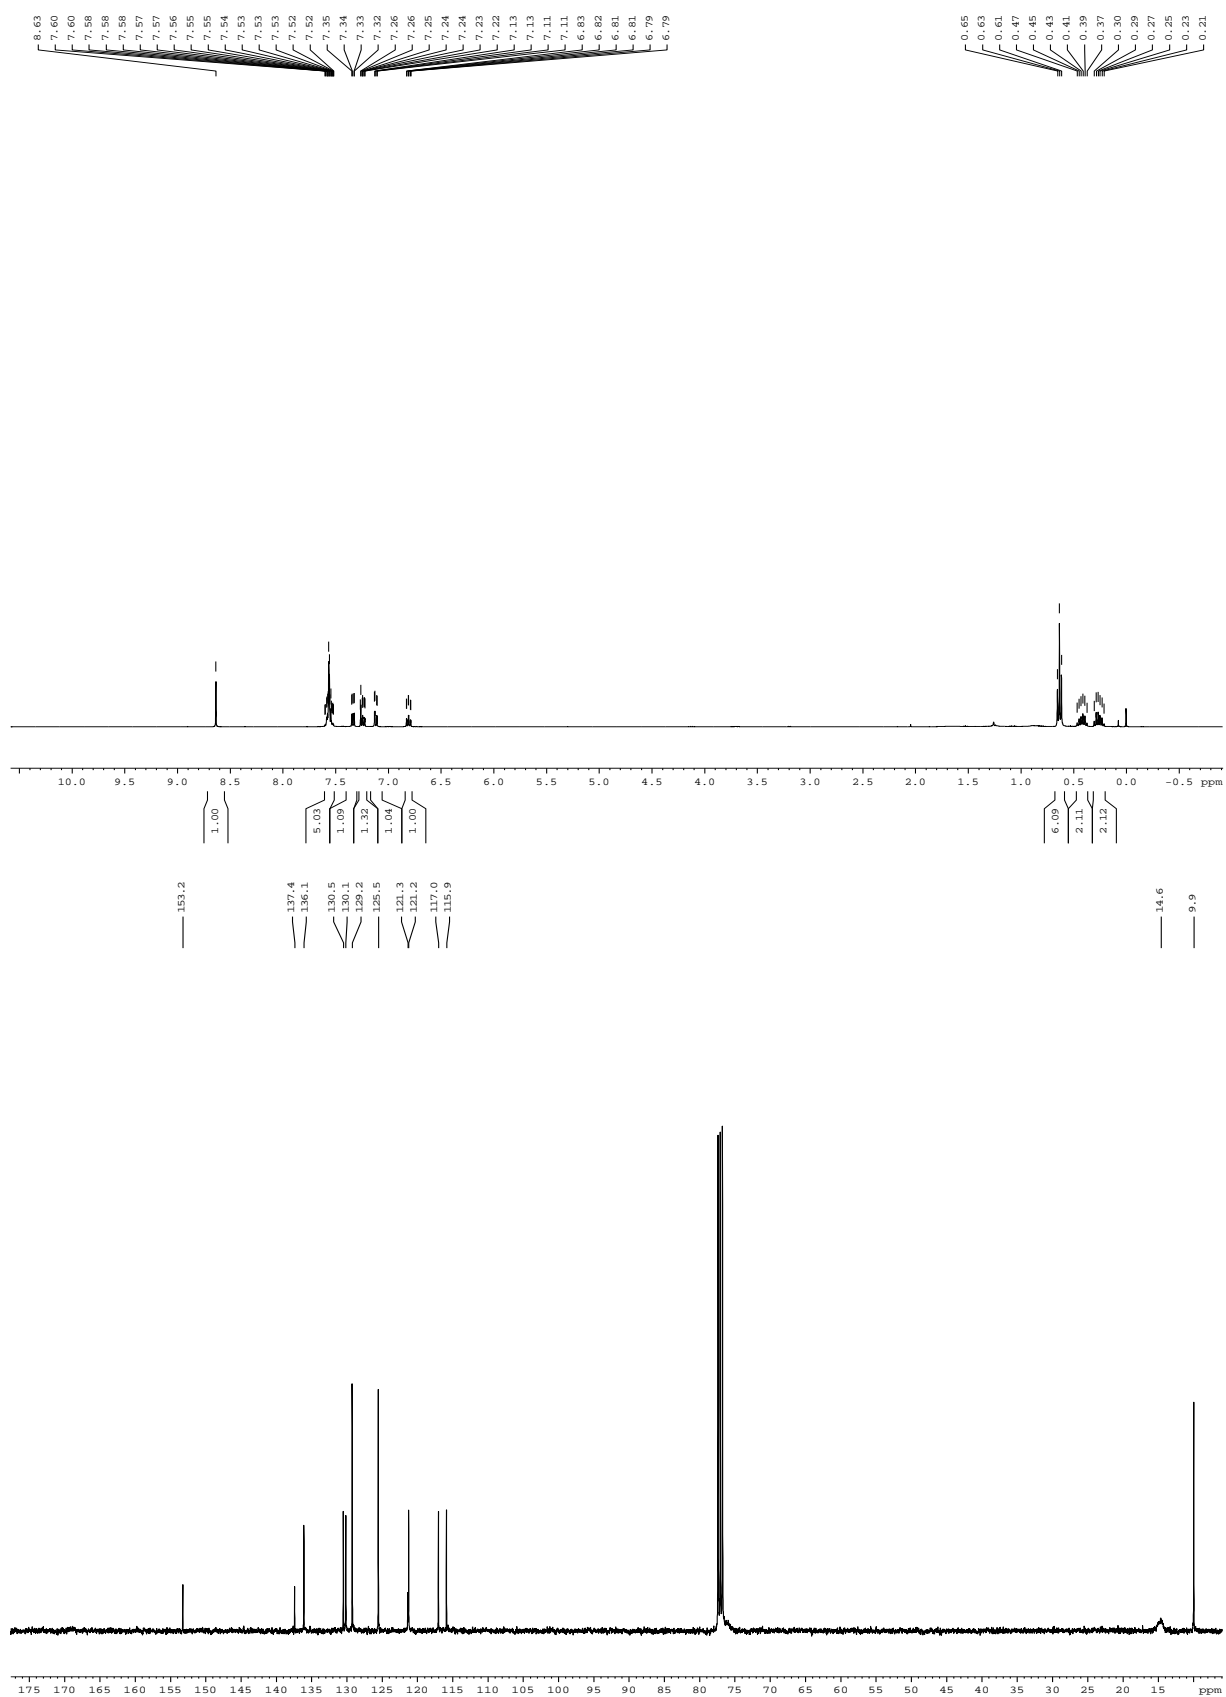

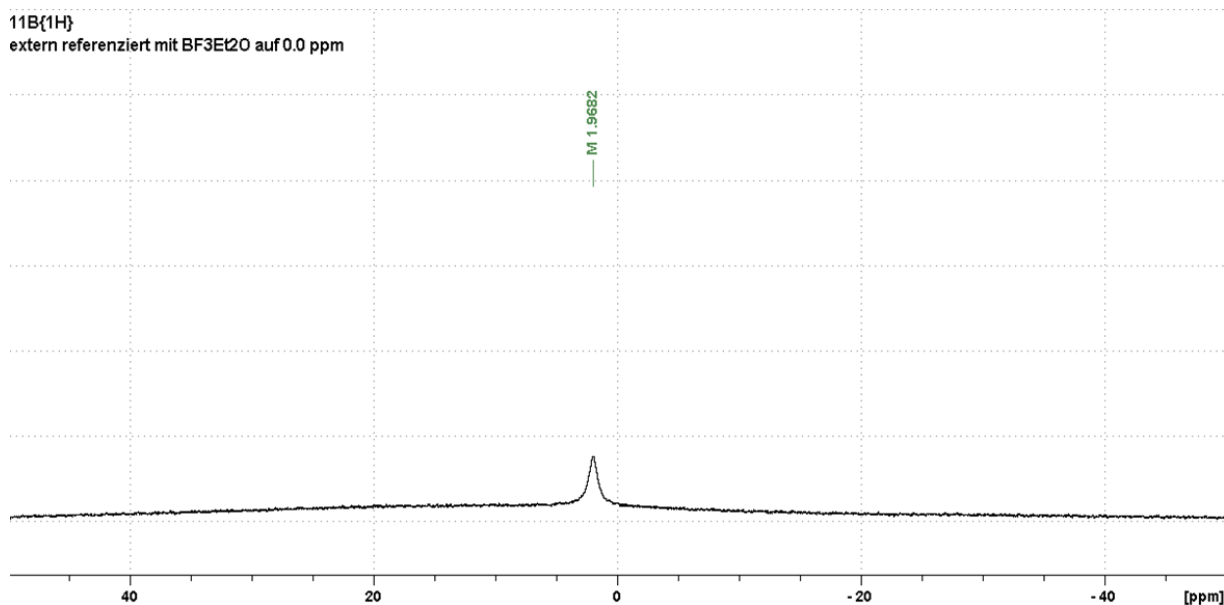

### 3,4,4-Triphenyl-4*H*-benzo[*e*][1,2,4]triazolo[3,4-*c*][1,4,2]oxazaborinin-3-ium-4-ide 15b

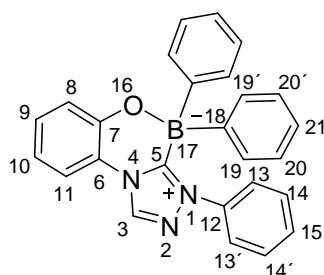

Method A: Under an inert atmosphere a solution of 0.242 g (1.0 mmol) of triphenylborane in 2 mL of anhydrous dioxane was added to a suspension of 0.119 g (0.50 mmol) of 2-(1-phenyl-4*H*-1,2,4-triazolium-4-yl)phenolate in 5 mL of the same solvent. The mixture was stirred at 100 °C in a Schlenk-tube for 8 h. After cooling to rt, the mixture was diluted with dioxane and subjected to column chromatography (ethyl acetate/petroleum ether). Yield: 0.050 g (25%) of a colorless solid, mp: 86 °C;

Method B: Under an inert atmosphere a flask was charged with triphenyl(2-(1-phenyl-4*H*-1,2,4-triazolium-4-yl)phenoxy)borate (0.240 g, 0.5 mmol) and dry dioxane (10 mL). The mixture was then stirred at 100 °C for 8 h. After evaporation, the resulting precipitate was purified by column chromatography (silica gel, ethyl acetate/petroleum ether). Yield: 0.178 g (89%), mp: 86 °C.

$^1\text{H}$  NMR (600 MHz,  $\text{CDCl}_3$ ):  $\delta$  = 8.68 (s, 1 H, 3-H), 7.34 (d,  $J$  = 7.9 Hz, 1 H, 11-H), 7.29 (tt,  $J_1$  = 1.4 Hz,  $J_2$  = 3.1 Hz, 1 H, 15-H), 7.24 - 7.25 (m, 2 H, 9/10-H), 7.18 (dd,  $J_1$  = 2.0 Hz,  $J_2$  = 7.7 Hz, 4 H, 19/19'-H), 7.12 - 7.15 (m, 2 H, 14/14'-H), 7.05 - 7.11 (m, 8 H, 13/13'/20/20'/21-H), 6.82 - 6.84 (m, 1 H, 8-H) ppm;  $^{13}\text{C}$  NMR (150 MHz,  $\text{CDCl}_3$ ):  $\delta$  = 152.1 (o, C-7), 136.4 (o, C-12), 136.0 (+, C-3), 133.2 (+, C-19/C-19'), 130.3 (+, C-9), 129.6 (+, C-15), 128.6 (+, C-13/C-13'), 127.1 (+, C-20/C-20'), 125.9 (+, C-21), 125.5 (+, C-14/C-14'), 121.8 (+, C-10), 121.5 (o, C-6), 118.2 (+, C-8), 116.1 (+, C-11) ppm;  $^{11}\text{B}$  NMR ( $\text{CDCl}_3$ , 193 MHz,  $\text{BF}_3 \cdot \text{Et}_2\text{O}$ ):  $\delta$  = -0.08 ppm; IR (ATR):  $\bar{\nu}$  = 3042, 1530, 1305, 1279, 1181, 979, 926, 898, 739, 701, 688, 660, 650  $\text{cm}^{-1}$ ; MS (ESI 30 V):  $m/z$  (%) = 424.1 (100)  $[\text{M}+\text{Na}]^+$ . HR-ESI-MS: calcd for  $\text{C}_{26}\text{H}_{20}\text{N}_3\text{OBNa}^+$  424.1597. Found 424.1598.

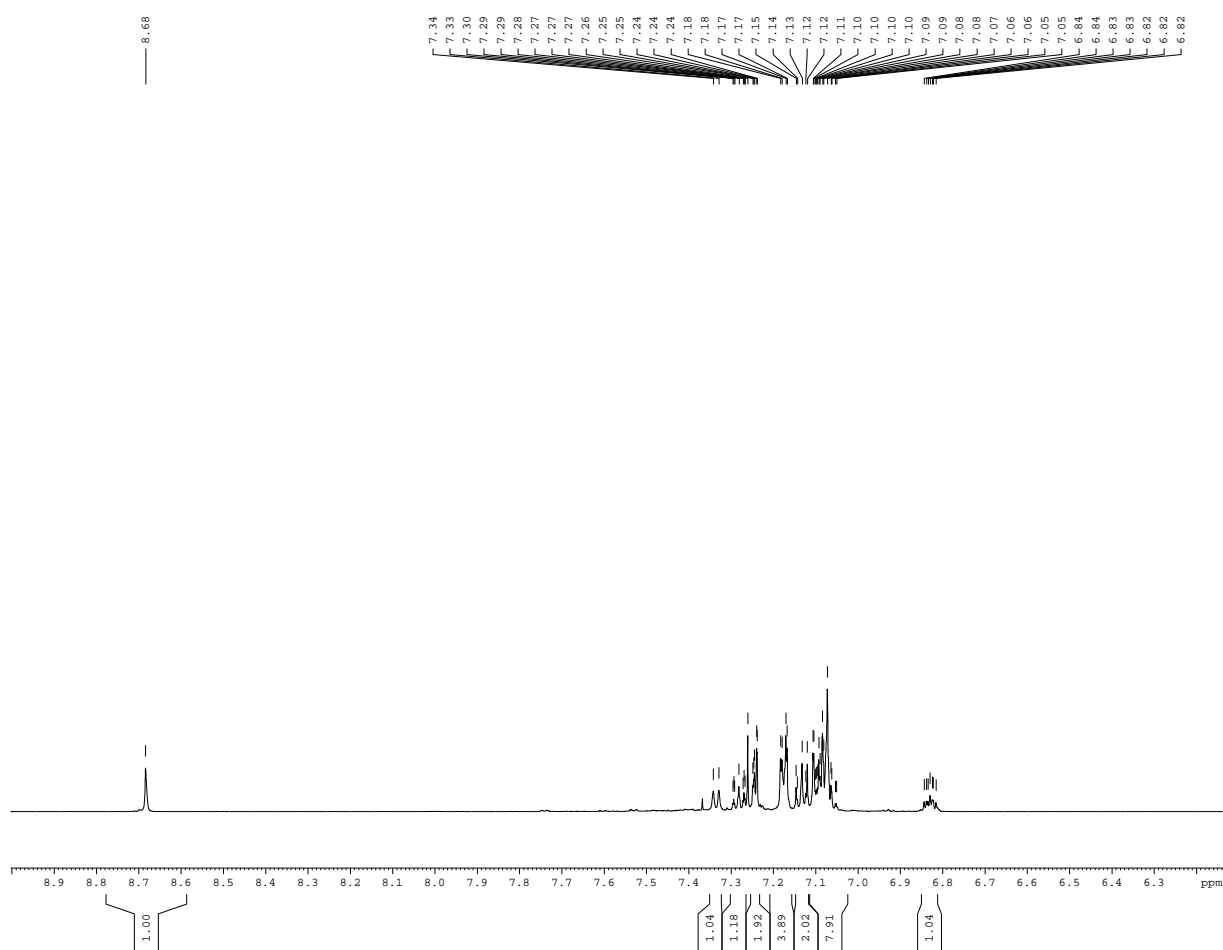

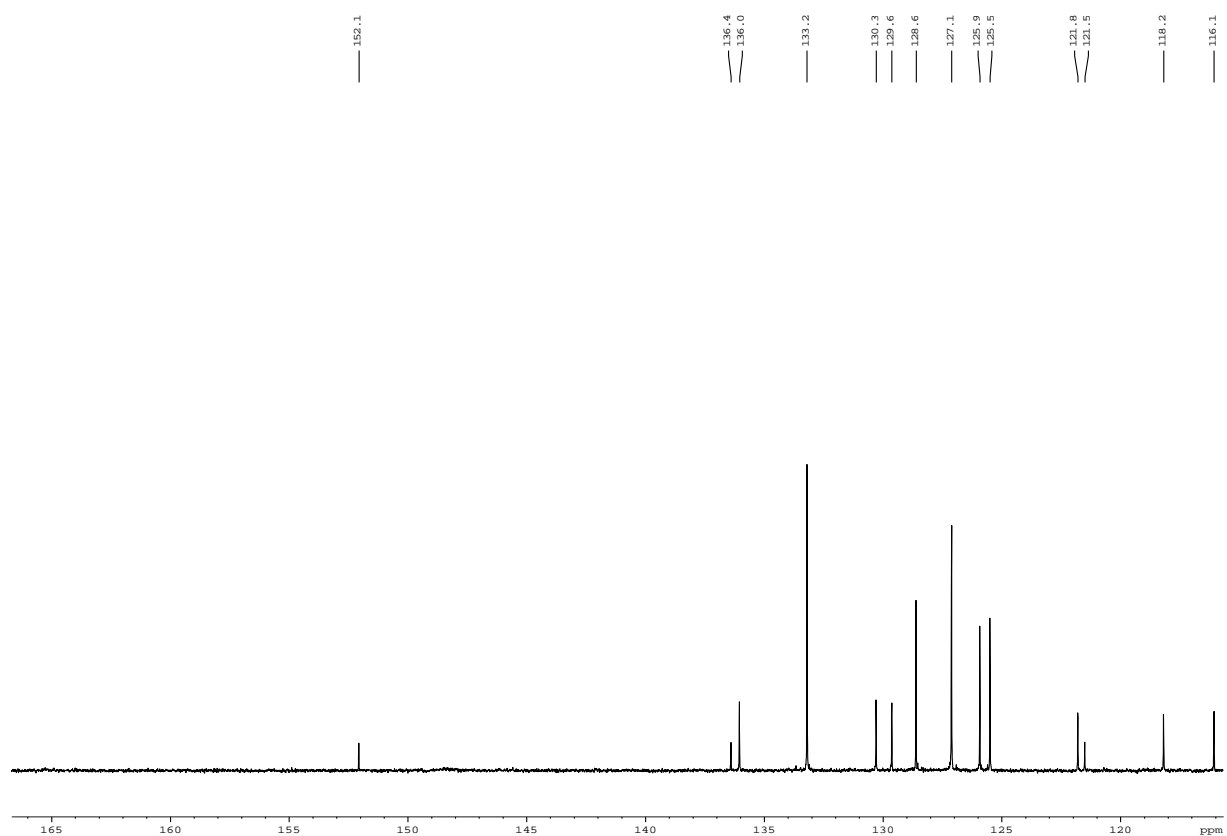

**$^{11}\text{B}\{^1\text{H}\}$**   
 extern referenziert mit  $\text{BF}_3\text{Et}_2\text{O}$  auf 0.0 ppm

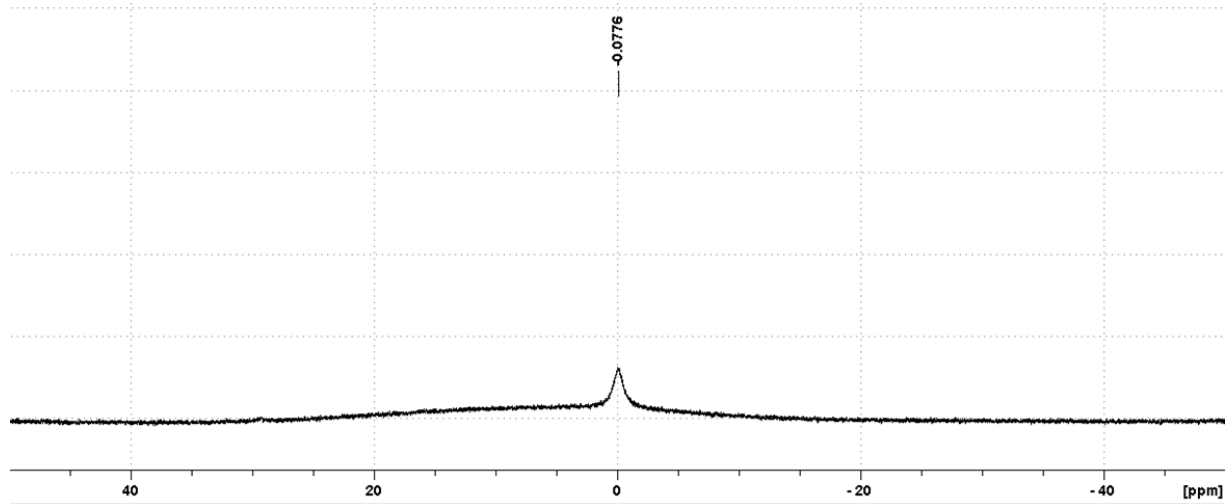

**4,4-Diethyl-3-phenyl-4*H*-benzo[*e*][1,2,4]triazolo[3,4-*c*][1,4,2]oxazaborinin-3-ium-4-ide 15c**

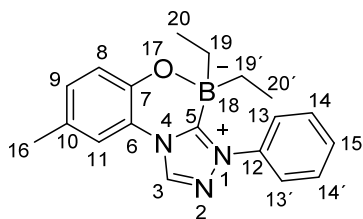

Under an inert atmosphere a solution of 460 mg (5 mmol) of triethylborane in 2 mL of anhydrous dioxane was added to a suspension of 0.126 g (0.50 mmol) of 2-(1-phenyl-4*H*-1,2,4-triazolium-4-yl)phenolate in 5 mL of the same solvent. The mixture was stirred at 100 °C in a Schlenk-tube for 8 h. After cooling to rt, the mixture was treated with dioxane and subjected to column chromatography (ethyl acetate/petroleum ether). Yield: 0.120 g (75%) of a colorless solid, mp: 114 °C; <sup>1</sup>H NMR (600 MHz, CDCl<sub>3</sub>): δ = 8.62 (s, 1 H, 3-H), 7.52 - 7.58 (m, 5 H, 13/13'/14/14'/15-H), 7.14 (d, *J* = 1.6 Hz, 1 H, 11-H), 7.05 (dd, *J*<sub>1</sub> = 1.6 Hz, *J*<sub>2</sub> = 8.3 Hz, 1 H, 9-H), 7.02 (d, *J* = 8.3 Hz, 1 H, 8-H), 2.33 (s, 3 H, 16-H), 0.63 (t, *J* = 7.7 Hz, 6 H, 20/20'-H), 0.37 - 0.43 (overlapped signals, 2 H, 19/19'-H), 0.22 - 0.28 (overlap, 2 H, 19/19'-H) ppm; <sup>13</sup>C NMR (150 MHz, CDCl<sub>3</sub>): δ = 169.0 (o, C-5), 150.8 (o, C-7), 137.4 (o, C-12), 136.0 (+, C-3), 130.8 (+, C-9), 130.4 (+, C-15), 129.2 (+, C-13/C-13'), 126.5 (o, C-10), 125.5 (+, C-14/C-14'), 120.9 (o, C-6), 120.9 (+, C-8), 116.2(+, C-11), 20.6 (+, C-16), 14.5 (-, C-19/C-19'), 9.9 (+, C-20/C-20') ppm; <sup>11</sup>B NMR (CDCl<sub>3</sub>, 193 MHz, BF<sub>3</sub>·Et<sub>2</sub>O): δ = - 0.98 ppm; IR (ATR):  $\bar{\nu}$  = 2864, 1513, 1456, 1305, 1117, 913, 897, 868, 821, 763, 689, 661 cm<sup>-1</sup>; MS (ESI 30 V): *m/z* (%) = 342.1 (100) [M+Na]<sup>+</sup>. HR-ESI-MS: calcd for C<sub>19</sub>H<sub>22</sub>N<sub>3</sub>OBNa<sup>+</sup> 342.1754. Found 342.1758.

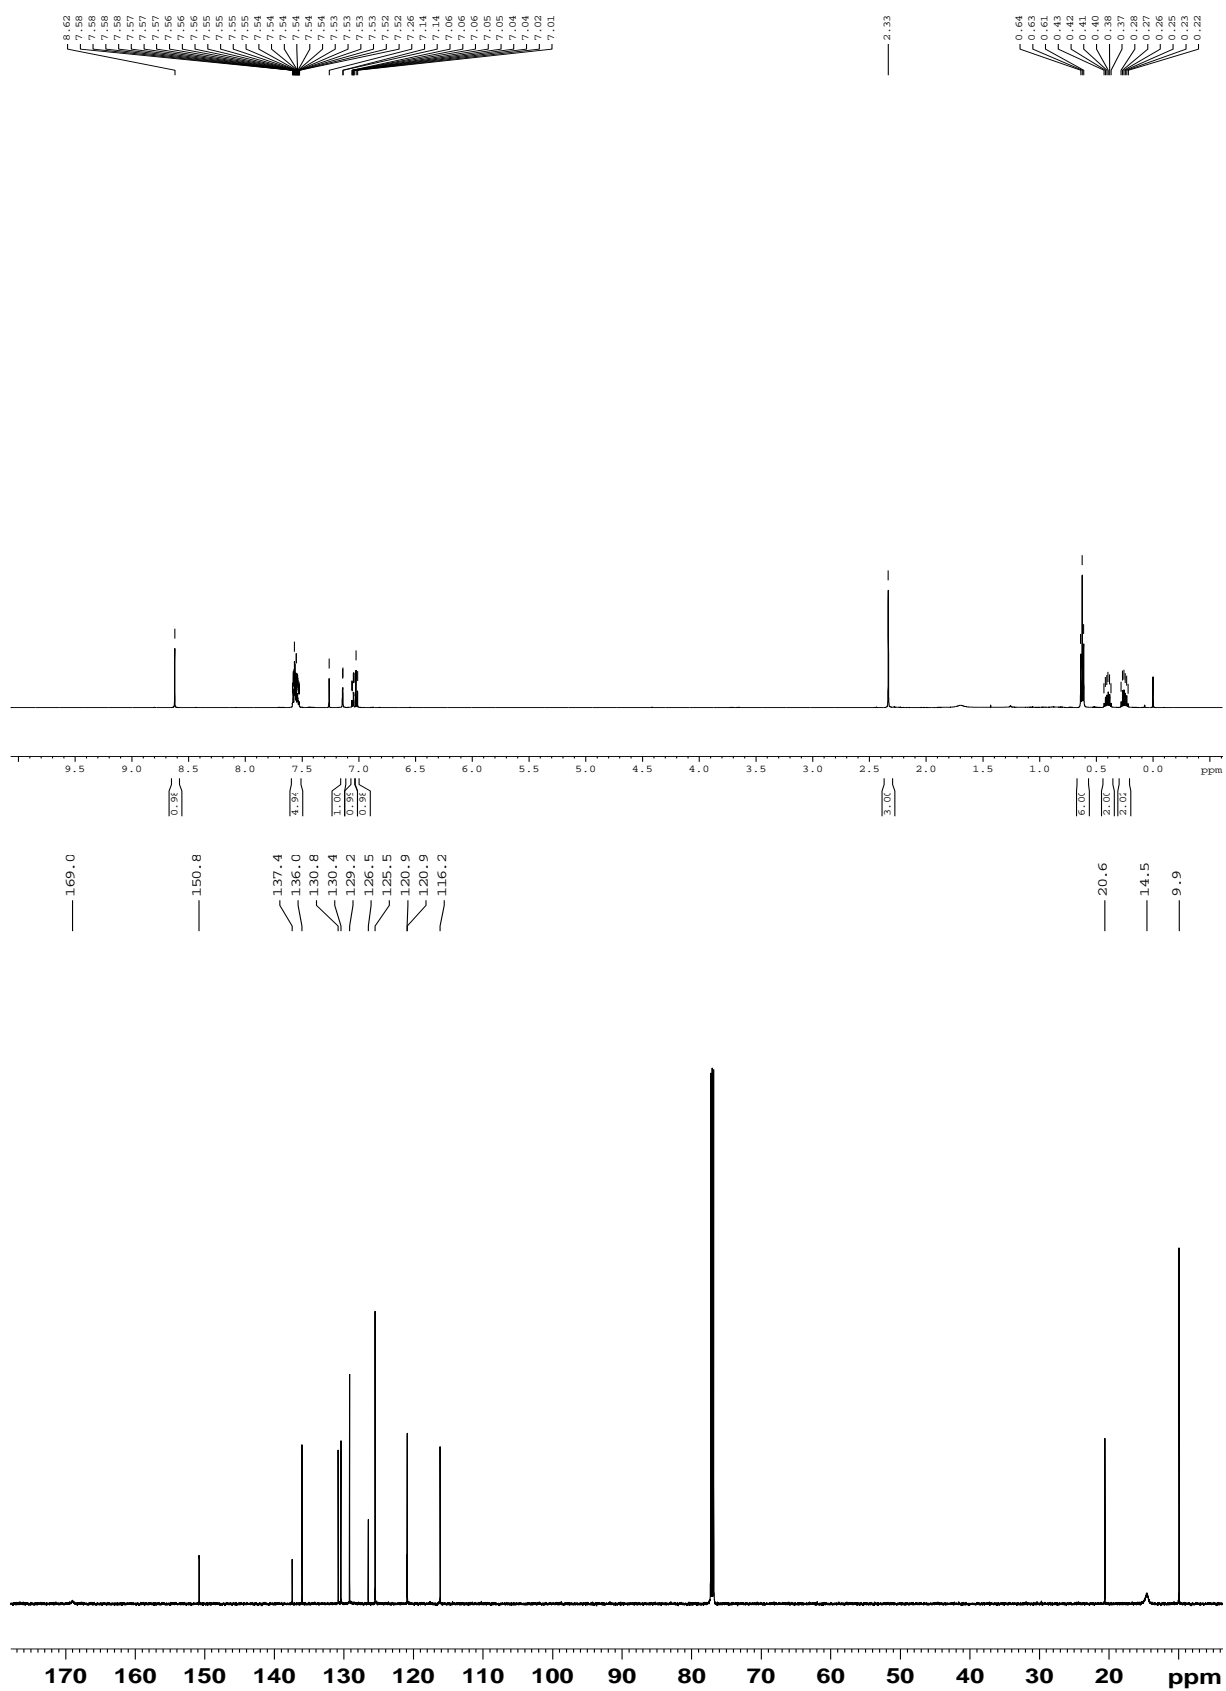

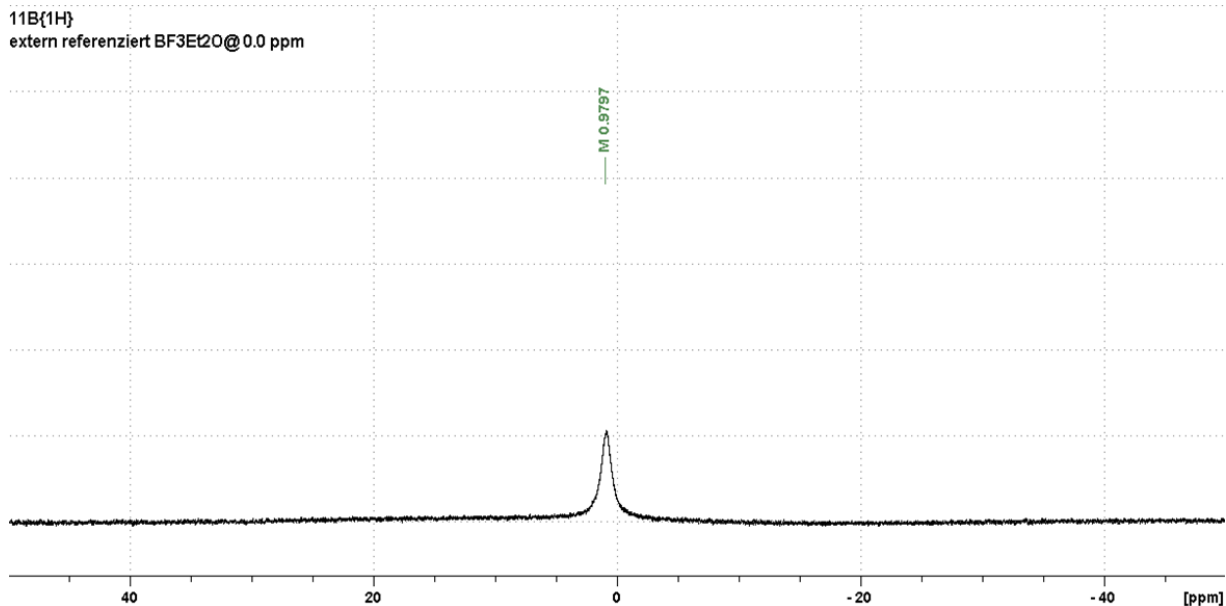

**8-Methyl-3,4,4-triphenyl-4*H*-benzo[*e*][1,2,4]triazolo[3,4-*c*][1,4,2]oxazaborinin-3-ium-4-ide 15d**

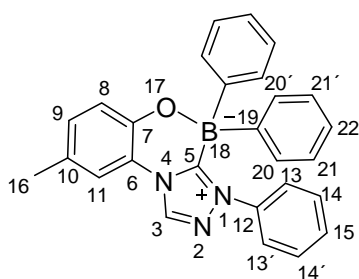

Method A: Under an inert atmosphere a solution of 0.242 g (1.0 mmol) of triphenylborane in 2 mL of anhydrous dioxane was added to a suspension of 0.126 g (0.50 mmol) of 2-(1-phenyl-4*H*-1,2,4-triazolium-4-yl)phenolate in 5 mL of the same solvent. The mixture was stirred at 100 °C in a Schlenk-tube for 8 h. After cooling to rt, the mixture was treated with dioxane and subjected to column chromatography (ethyl acetate/petroleum ether). Yield: 0.093 g (45%) of a colorless solid, mp: 182 °C;

Method B: Under an inert atmosphere a flask was charged with (4-methyl-2-(1-phenyl-4*H*-1,2,4-triazolium-4-yl)phenoxy)triphenylborate (0.247 g, 0.5 mmol) and dry dioxane (10 mL), and the mixture was stirred at 100 °C for 8 h. After evaporation, the resulting precipitate was purified by column chromatography (silica gel, ethyl acetate/petroleum ether). Yield: 0.187 g (90%) of a colorless solid, mp: 182 °C.

<sup>1</sup>H NMR (600 MHz, CDCl<sub>3</sub>): δ = 8.65 (s, 1 H, 3-H), 7.27 (tt, *J*<sub>1</sub> = 2.3 Hz, *J*<sub>2</sub> = 6.5 Hz 1 H, 15-H), 7.18 (dd, *J*<sub>1</sub> = 0.9 Hz, *J*<sub>2</sub> = 7.2 Hz, 4 H, 20/20'-H), 7.10 - 7.14 (m, 6 H, 13/13'/14/14'/11/8-H), 7.04 - 7.09 (m, 7 H,

21/21'/22/9-H), 2.29 (s, 3 H, 16-H) ppm;  $^{13}\text{C}$  NMR (150 MHz,  $\text{CDCl}_3$ ):  $\delta$  = 149.7 (o, C-19), 148.3 (o, C-7), 136.4 (o, C-12), 136.0 (+, C-3), 133.2 (+, C-20/C-20'), 130.0 (+, C-9), 129.6 (+, C-15), 128.6 (+, C-13/C-13'), 127.7 (o, C-10), 127.1 (+, C-21/C-21'), 125.9 (+, C-22), 125.4 (+, C-14/C-14'), 121.4 (+, C-8), 121.1 (o, C-6), 116.3 (+, C-11), 20.6 (+, C-16) ppm;  $^{11}\text{B}$  NMR ( $\text{CDCl}_3$ , 193 MHz,  $\text{BF}_3 \cdot \text{Et}_2\text{O}$ ):  $\delta$  = -0.80 ppm; IR (ATR):  $\bar{\nu}$  = 1511, 1301, 1177, 1145, 927, 907, 872, 823, 739, 689, 660  $\text{cm}^{-1}$ ; MS (ESI 30 V):  $m/z$  (%) = 438.1 (100)  $[\text{M}+\text{Na}]^+$ . HR-ESI-MS: calcd for  $\text{C}_{27}\text{H}_{22}\text{N}_3\text{OBNa}^+$  438.1754. Found 438.1758.

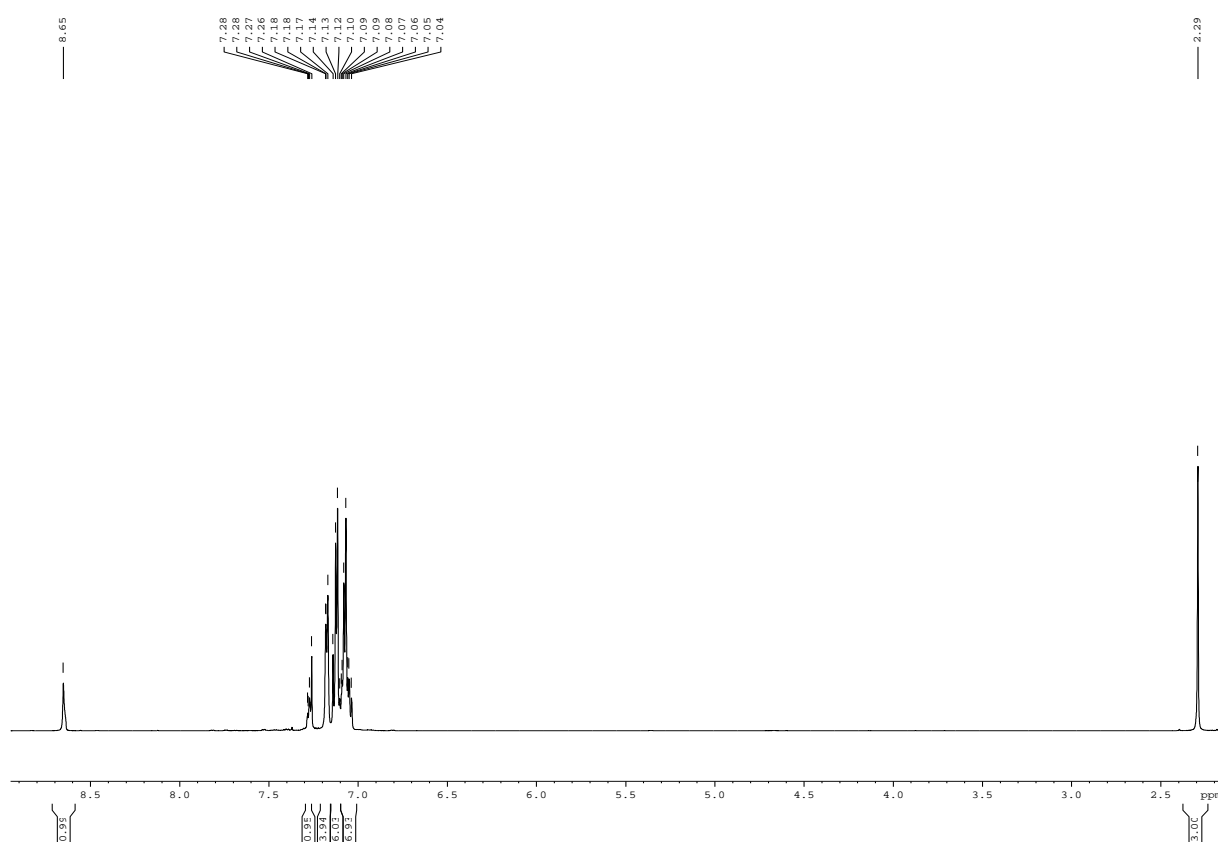

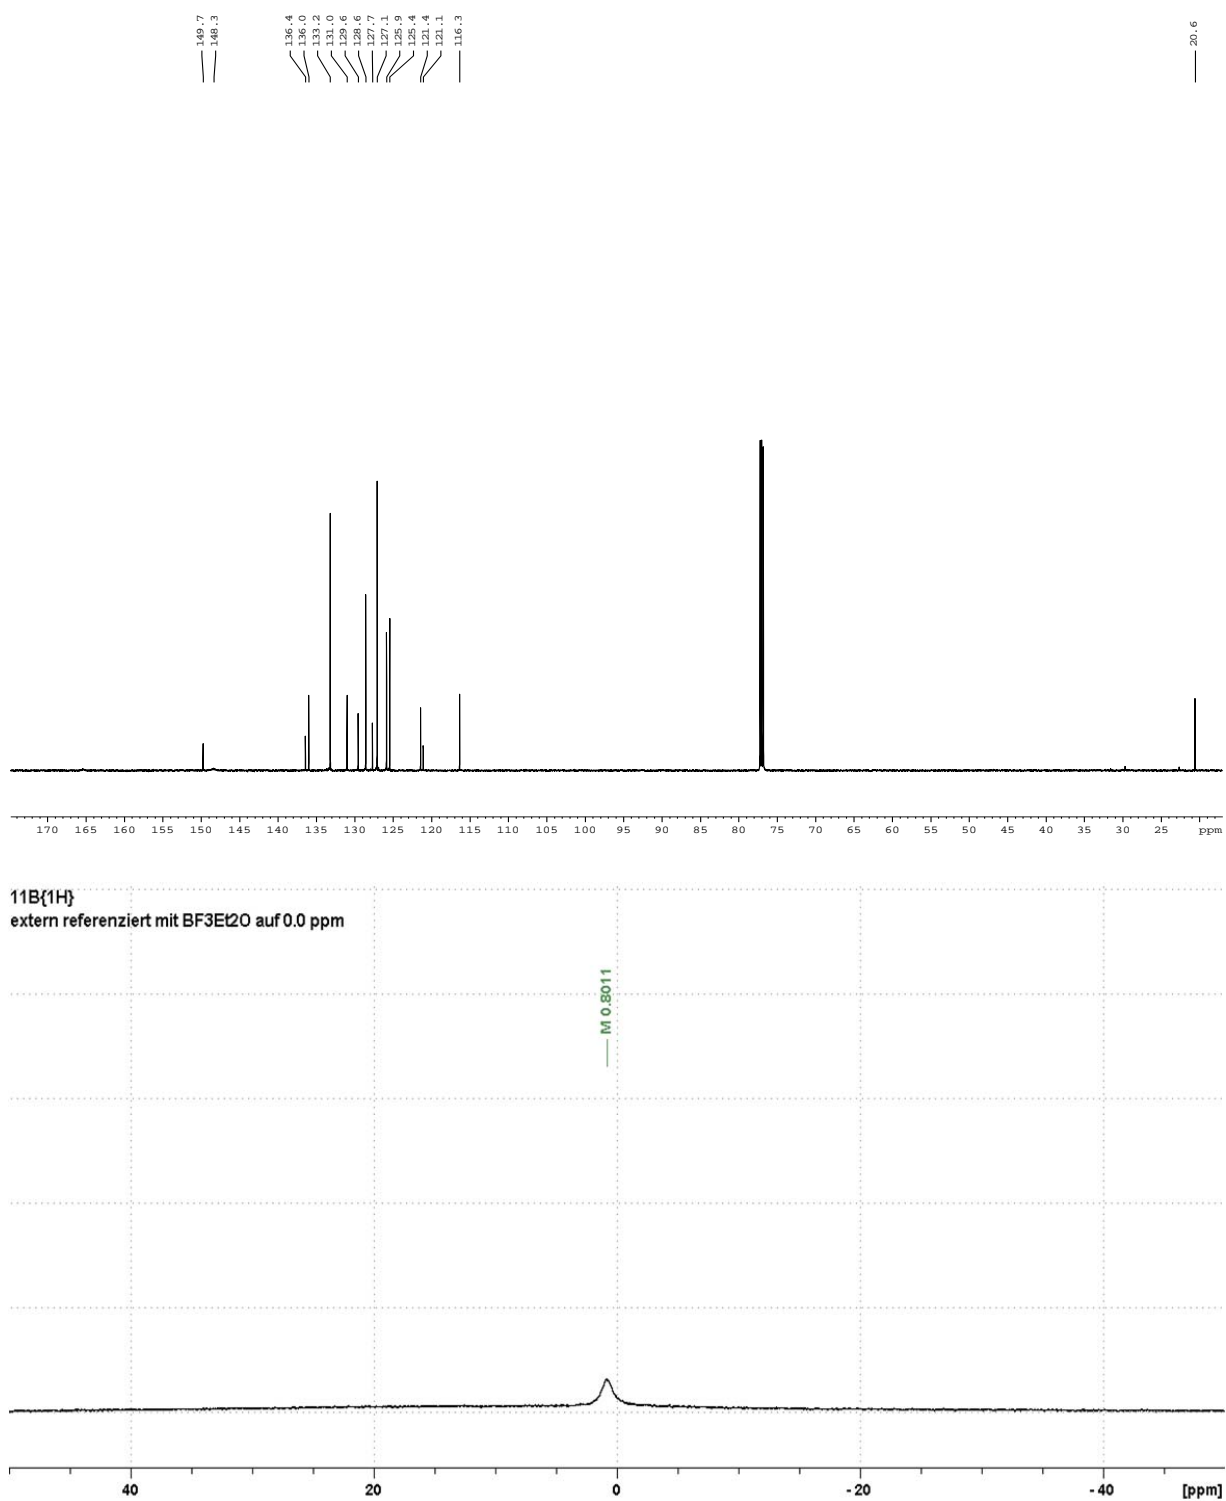

[1] S. E. O'Toole, S. J. Cannon, *Org. Biomol. Chem.* **2009**, 7, 3584 - 3593.
